# Supplementary material for: SETD7 Expression Is Associated with Breast Cancer Survival Outcomes for Specific Molecular Subtypes: A Systematic Analysis of Publicly Available Datasets
Source: MDPI journal article supplement (doi:10.3390/cancers14246029), 2022-12-07
Supplement: s1 [file s1]

**Table S1.** Breast cancer datasets with *SETD7* expression (mRNA or protein), mutation or copy number information. HPA – Human Protein Atlas; MBC – Metastatic Breast Cancer; NA – not available; NGS – Next Generation Sequencing; RPPA – Reverse Phase Protein Arrays; WES – Whole Exome Sequencing.

| Online Tool | Type of data (method) | Dataset (information about the sample, n = sample size)                                           | PAM50 Subtypes (LumA / LumB / Her2 / Basal / Normal) | Stage (0 / 1 / 2 / 3 / 4) | Grade (1 / 2 / 3) | Lymph node status (positive / negative) | Therapy (none / chemotherapy / hormone therapy / both) |
|-------------|-----------------------|---------------------------------------------------------------------------------------------------|------------------------------------------------------|---------------------------|-------------------|-----------------------------------------|--------------------------------------------------------|
| TNMplot     | mRNA (RNA-seq)        | TCGA, TARGET, GTEx (paired tumour and adjacent normal tissues, n = 112)                           | NA                                                   | NA                        | NA                | NA                                      | NA                                                     |
| KM plotter  | mRNA (Gene chip)      | E-MTAB-365 (n = 426)                                                                              | 174 / 149 / 53 / 49 / 1                              | NA                        | NA                | 285 / 134                               | NA                                                     |
|             |                       | GSE12276 (tumours with known site of relapse – focus on brain, n = 204)                           | 34 / 72 / 38 / 59 / 1                                | NA                        | NA                | NA                                      | NA                                                     |
|             |                       | GSE16391 (Primary ER+/PR-/HER2- tumours of endocrine-treated patients, includes relapses, n = 48) | 27 / 19 / 2 / 0 / 0                                  | NA                        | 2 / 30 / 16       | 30 / 18                                 | 0 / 0 / 30 / 18                                        |

|  |  |                                                                                                              |                           |    |                  |           |                   |
|--|--|--------------------------------------------------------------------------------------------------------------|---------------------------|----|------------------|-----------|-------------------|
|  |  | GSE16446<br>(Primary ER-negative<br>tumours of anthracycline-<br>treated patients<br>(neoadjuvant), n = 107) | 0 / 0 / 34 / 72 / 1       | NA | 2 / 19 /<br>81   | 59 / 48   | 0 / 107 / 0 / 0   |
|  |  | GSE17907<br>(Tumours with<br>amplification of<br>the <i>ERBB2</i> locus, n = 38)                             | 5 / 5 / 24 / 2 / 2        | NA | 0 / 8 / 29       | 24 / 11   | 0 / 23 / 1 / 13   |
|  |  | GSE19615<br>(n = 115)                                                                                        | 45 / 23 / 17 / 30 / 0     | NA | 23 / 28 /<br>64  | 53 / 62   | 7 / 38 / 21 / 42  |
|  |  | GSE20685<br>(n = 327)                                                                                        | 117 / 91 / 69 / 42 /<br>8 | NA | NA               | NA        | NA                |
|  |  | GSE20711<br>(n = 88)                                                                                         | 16 / 32 / 17 / 23 / 0     | NA | 13 / 5 /<br>70   | 59 / 29   | NA                |
|  |  | GSE21653<br>(n = 230)                                                                                        | 73 / 59 / 21 / 69 / 8     | NA | 43 / 77 /<br>107 | 119 / 108 | 55 / 43 / 52 / 80 |
|  |  | GSE42568<br>(naïve tumours, n = 104)                                                                         | 27 / 28 / 12 / 30 / 7     | NA | 11 / 40 /<br>53  | 59 / 45   | 104 / 0 / 0 / 0   |
|  |  | GSE48390<br>(breast tumours from<br>Taiwanese women, n = 80)                                                 | 27 / 28 / 10 / 8 / 7      | NA | NA               | NA        | NA                |
|  |  | GSE58812<br>(triple-negative (IHC), n =<br>107)                                                              | 6 / 4 / 13 / 80 /         | NA | NA               | NA        | NA                |
|  |  | GSE61304<br>(n = 58)                                                                                         | 16 / 15 / 11 / 16 / 0     | NA | 5 / 16 /<br>37   | 37 / 20   | NA                |

|            |                       |                                                                                                              |                                 |                                   |                                |                |                           |
|------------|-----------------------|--------------------------------------------------------------------------------------------------------------|---------------------------------|-----------------------------------|--------------------------------|----------------|---------------------------|
|            |                       | GSE65194<br>(n = 130)                                                                                        | 29 / 17 / 43 / 41 / 0           | NA                                | NA                             | 53 / 58        | NA                        |
|            |                       | GSE9195<br>(ER+ primary breast tumors<br>of patients treated by<br>Tamoxifen in adjuvant<br>setting, n = 77) | 41 / 28 / 7 / 1 / 0             | NA                                | 14 / 20 /<br>24                | 36 / 41        | 0 / 0 / 77 / 0            |
|            | mRNA<br>(RNA-seq)     | GSE96058<br>(n = 2976)                                                                                       | 1504 / 668 / 295 /<br>309 / 200 | NA                                | 449 /<br>1394 /<br>1074        | 1067 /<br>1820 | 313 / 340 /<br>1448 / 854 |
|            | Protein<br>(LC-MS/MS) | Tang_2018<br>(n = 65)                                                                                        | NA                              | 0 / 6 / 46<br>/ 13 / 0            | 8 / 19 /<br>28                 | 27 / 37        | NA                        |
|            | HPA                   | mRNA<br>(RNA-seq)                                                                                            | TCGA<br>(n = 1075)              | NA                                | 0 / 180 /<br>609 /<br>243 / 20 | NA             | NA                        |
| cBioPortal | Mutation<br>(WES)     | CPTAC, Cell 2020*<br>(treatment-naïve primary<br>tumors, n = 122)                                            | 57 / 17 / 14 / 29 / 5           | 0 / 4 / 70<br>/ 33 / 0<br>(15 NA) | NA                             | NA             | 122 / 0 / 0 / 0           |
|            | Copy number<br>(WES)  |                                                                                                              |                                 |                                   |                                |                |                           |
|            | mRNA<br>(RNA-seq)     |                                                                                                              |                                 |                                   |                                |                |                           |
|            | Protein<br>(LC-MS/MS) |                                                                                                              |                                 |                                   |                                |                |                           |
|            | Phosphoproteome       |                                                                                                              |                                 |                                   |                                |                |                           |

|  |                             |                                                     |                                                                      |                                    |                           |                      |                                                            |
|--|-----------------------------|-----------------------------------------------------|----------------------------------------------------------------------|------------------------------------|---------------------------|----------------------|------------------------------------------------------------|
|  | (LC-MS/MS)                  |                                                     |                                                                      |                                    |                           |                      |                                                            |
|  | Acetylproteome (LC-MS/MS)   |                                                     |                                                                      |                                    |                           |                      |                                                            |
|  | Mutation (Gene chip)        | METABRIC, Nature 2012 & Nat Commun 2016 (n = 2509)  | 700 / 475 / 224 / 209 / 148<br><br>(218 claudin-low / 529 NA / 6 NC) | 24 / 630 / 979 / 144 / 11 (721 NA) | 214 / 976 / 1198 (121 NA) | 1047 / 1196 (266 NA) | 543 / 221 / 1025 / 191 (529 NA)                            |
|  | Copy number (Gene chip)     |                                                     |                                                                      |                                    |                           |                      |                                                            |
|  | mRNA (Gene chip)            |                                                     |                                                                      |                                    |                           |                      |                                                            |
|  | Promoter methylation (RRBS) |                                                     |                                                                      |                                    |                           |                      |                                                            |
|  | Mutation (WES)              | SMC 2018* (tumors from a Korean BC cohort, n = 187) | 47 / 65 / 18 / 36 / 2 (19 NA)                                        | 0 / 27 / 101 / 58 / 1              | NA                        | NA                   | (info only on neoadjuvant chemotherapy: no = 178; yes = 9) |
|  | mRNA (RNA-seq)              |                                                     |                                                                      |                                    |                           |                      |                                                            |
|  | Mutation (WES)              | TCGA PanCancer Atlas (n = 1084)                     | 499 / 197 / 78 / 171 / 36<br><br>(103 NA)                            | 0 / 277 / 628 / 137 / 39 (3 NA)    | NA                        | 687 / 33 (364 NA)    | (neoadjuvant therapy: no = 1077; yes = 6; NA = 1)          |
|  | Copy number (WES)           |                                                     |                                                                      |                                    |                           |                      |                                                            |
|  | mRNA (RNA-seq)              |                                                     |                                                                      |                                    |                           |                      |                                                            |
|  | Protein (RPPA)              |                                                     |                                                                      |                                    |                           |                      |                                                            |
|  | Mutation (WES)              | MBC Project, Provisional, February 2020*            | NA                                                                   |                                    |                           | 23 / 92 (65 NA)      | (any therapy for more than                                 |

|  |                              |                                         |                            |                               |                           |                    |                                                      |
|--|------------------------------|-----------------------------------------|----------------------------|-------------------------------|---------------------------|--------------------|------------------------------------------------------|
|  | Copy number (WES)            | (n = 180)                               |                            | 14 / 44 / 43 / 0 (79 NA)      | 11 / 27 / 21 / 51 (70 NA) |                    | 2 years after diagnosis: no = 131; yes = 46; NA = 3) |
|  | mRNA (RNA-seq)               |                                         |                            |                               |                           |                    |                                                      |
|  | Mutations (NGS)              | MSK, Cancer Discovery 2021* (n = 1116)  | NA                         | NA                            | NA                        | NA                 | NA                                                   |
|  | Copy number (NGS)            |                                         |                            |                               |                           |                    |                                                      |
|  | Mutations (NGS)              | MSK, Cancer Cell 2018 (n = 1756)        | NA                         | 556 / 563 / 390 / 395 (14 NA) | 98 / 456 / 1175 (189 NA)  | 765 / 745 (246 NA) | NA                                                   |
|  | Copy number (NGS)            |                                         |                            |                               |                           |                    |                                                      |
|  | Mutations (NGS and Sequenom) | MSK, Nature Cancer 2020* (n = 51)       | 51 / 0 / 0 / 0 / 0         | NA                            | NA                        | NA                 | 0 / NA / 51 / NA                                     |
|  | Copy number (NGS)            |                                         |                            |                               |                           |                    |                                                      |
|  | Mutations (WES)              | MSK, Cancer Res 2020* (n = 32)          | NA                         | NA                            | NA                        | NA                 | NA                                                   |
|  | Mutations (NGS)              | MSKCC, NPJ Breast Cancer 2019* (n = 68) | 68 / 0 / 0 / 0 / 0         | NA                            | NA                        | NA                 | NA                                                   |
|  | Copy number (NGS)            |                                         |                            |                               |                           |                    |                                                      |
|  | Mutations (targeted)         | British Columbia, 2012* (n = 65)        | 0 / 0 / 0 / 38 / 0 (27 NA) | NA                            | 4 / 3 / 56 (2 NA)         | 27 / 26 (12 NA)    | NA                                                   |

|  |                           |                                     |                                 |                     |                           |    |    |
|--|---------------------------|-------------------------------------|---------------------------------|---------------------|---------------------------|----|----|
|  | deep amplicon sequencing) |                                     |                                 |                     |                           |    |    |
|  | Mutations (WES)           | Broad, Nature 2012*<br>(n = 130)    | 37 / 21 / 18 / 13 / 9<br>(5 NA) | 11 / 73 /<br>19 / 0 | 4 / 29 /<br>26 (44<br>NA) | NA | NA |
|  | Mutations (WES)           | INSERM, PLoS Med 2016*<br>(n = 216) | NA                              | NA                  | NA                        | NA | NA |
|  | Copy number (WES)         |                                     |                                 |                     |                           |    |    |
|  | Mutations (WES)           | Sanger, Nature 2012*<br>(n = 100)   | NA                              | NA                  | 8 / 41 /<br>51            | NA | NA |

\*No survival data

**Table S2.** Association of *SETD7* expression with therapy, grade and stage using datasets in cBioPortal. Chi-squared test p-value and Benjamini-Hochberg FDR correction q-value. NA – Not available; ND – not determined, either because all samples were treatment-naïve or less than 10% of the patients received therapy; DE – Differentially expressed

| Dataset     | Analysis<br>(nSETD7 DE / nTotal<br>samples) | Therapy | Grade | Stage                |
|-------------|---------------------------------------------|---------|-------|----------------------|
| CPTAC - RNA | Overall<br>(61 / 122)                       | ND      | NA    | p = 0.24<br>q = 0.35 |
|             | Luminal A<br>(29 / 57)                      | ND      | NA    | p = 0.38<br>q = 0.57 |
|             | Luminal B<br>(9 / 17)                       | ND      | NA    | p = 0.45<br>q = 0.94 |
|             | Her2-enriched<br>(7 / 14)                   | ND      | NA    | p = 0.37<br>q = 0.71 |
|             | Basal<br>(15 / 29)                          | ND      | NA    | p = 0.95<br>q = 0.95 |
|             | Normal-like                                 | -       | -     | -                    |

|                 |                           |                                             |                      |                      |
|-----------------|---------------------------|---------------------------------------------|----------------------|----------------------|
|                 | (2 / 5)                   |                                             |                      |                      |
| CPTAC - protein | Overall<br>(61 / 122)     | ND                                          | NA                   | p = 0.72<br>q = 0.80 |
|                 | Luminal A<br>(29 / 57)    | ND                                          | NA                   | p = 0.64<br>q = 0.85 |
|                 | Luminal B<br>(9 / 17)     | ND                                          | NA                   | p = 0.55<br>q = 0.81 |
|                 | Her2-enriched<br>(7 / 14) | ND                                          | NA                   | p = 0.65<br>q = 0.86 |
|                 | Basal<br>(15 / 29)        | ND                                          | NA                   | p = 0.45<br>q = 0.70 |
|                 | Normal-like<br>(2 / 5)    | -                                           | -                    | -                    |
| METABRIC        | Overall<br>(952 / 2509)   | Hormone<br>therapy:<br>p = 0.13<br>q = 0.45 | p = 0.92<br>q = 0.95 | p = 0.05<br>q = 0.31 |



|  |                              |                                                                              |                      |                      |
|--|------------------------------|------------------------------------------------------------------------------|----------------------|----------------------|
|  |                              | Chemotherapy:<br>p = 0.35<br>q = 0.62                                        |                      |                      |
|  | luminal A<br>(339 / 700)     | Hormone<br>therapy:<br>p = 0.88<br>q = 0.99                                  | p = 0.30<br>q = 0.99 | p = 0.72<br>q = 0.99 |
|  | luminal B<br>(231 / 475)     | Hormone<br>therapy:<br>p = 0.90<br>q = 0.98                                  | p = 0.36<br>q = 0.98 | p = 0.13<br>q = 0.98 |
|  | Her2-enriched<br>(110 / 224) | Hormone<br>therapy:<br>p = 0.08<br>q = 0.89<br><br>Chemotherapy:<br>p = 0.33 | p = 0.14<br>q = 0.89 | p = 0.09<br>q = 0.89 |

|  |                           |                                                                                          |                      |                      |
|--|---------------------------|------------------------------------------------------------------------------------------|----------------------|----------------------|
|  |                           | q = 0.89                                                                                 |                      |                      |
|  | Basal<br>(99 / 209)       | Hormone<br>therapy:<br>p = 0.61<br>q = 0.95<br><br>Chemotherapy:<br>p = 0.37<br>q = 0.95 | p = 0.54<br>q = 0.95 | p = 0.92<br>q = 0.97 |
|  | Normal-like<br>(70 / 148) | Hormone<br>therapy:<br>p = 0.63<br>q = 1.00<br><br>Chemotherapy:<br>p = 0.78<br>q = 1.00 | p = 0.86<br>q = 1.00 | p = 0.07<br>q = 0.79 |

|     |                           |                                                                                          |                      |                      |
|-----|---------------------------|------------------------------------------------------------------------------------------|----------------------|----------------------|
|     | Caludin-low<br>(99 / 218) | Hormone<br>therapy:<br>p = 0.92<br>q = 0.98<br><br>Chemotherapy:<br>p = 0.95<br>q = 0.98 | p = 0.17<br>q = 0.89 | p = 0.18<br>q = 0.89 |
| SMC | Overall<br>(84 / 187)     | ND                                                                                       | NA                   | p = 0.67<br>q = 0.71 |
|     | Luminal A<br>(23 / 47)    | ND                                                                                       | NA                   | p = 0.44<br>q = 0.97 |
|     | Luminal B<br>(33 / 65)    | ND                                                                                       | NA                   | p = 0.64<br>q = 0.76 |
|     | Her2-enriched<br>(9 / 18) | ND                                                                                       | NA                   | p = 0.29<br>q = 0.60 |
|     | Basal<br>(18 / 36)        | ND                                                                                       | NA                   | p = 0.12<br>q = 0.43 |

|                         |                            |                              |                      |                      |
|-------------------------|----------------------------|------------------------------|----------------------|----------------------|
|                         | Normal-like<br>(- / 2)     | -                            | -                    | -                    |
| TCGA PanCancer<br>Atlas | Overall<br>(541 / 1084)    | ND                           | NA                   | p = 0.10<br>q = 0.19 |
|                         | Luminal A<br>(249 / 499)   | ND                           | NA                   | p = 0.42<br>q = 0.62 |
|                         | Luminal B<br>(99 / 197)    | ND                           | NA                   | p = 0.46<br>q = 0.95 |
|                         | Her2-enriched<br>(39 / 78) | ND                           | NA                   | p = 0.24<br>q = 0.81 |
|                         | Basal<br>(85 / 171)        | ND                           | NA                   | p = 0.56<br>q = 0.88 |
|                         | Normal-like<br>(18 / 36)   | ND                           | NA                   | p = 0.47<br>q = 0.69 |
| MBC Project             | Overall<br>(73 / 180)      | Any:<br>p = 0.62<br>q = 0.91 | p = 0.69<br>q = 0.97 | p = 0.47<br>q = 0.88 |
|                         | ER+                        | Any:                         | p = 0.23             | p = 0.38             |

|  |                    |                              |                      |                      |
|--|--------------------|------------------------------|----------------------|----------------------|
|  | (33 / 113)         | p = 0.36<br>q = 0.93         | q = 0.93             | q = 0.93             |
|  | ER-<br>(7 / 23)    | Any:<br>p = 0.91<br>q = 0.94 | p = 0.33<br>q = 0.94 | p = 0.29<br>q = 0.94 |
|  | PR+<br>(25 / 85)   | Any:<br>p = 0.25<br>q = 0.91 | p = 0.15<br>q = 0.91 | p = 0.13<br>q = 0.91 |
|  | PR-<br>(14 / 43)   | Any:<br>p = 0.88<br>q = 0.99 | p = 0.39<br>q = 0.99 | p = 0.35<br>q = 0.99 |
|  | HER2+<br>(11 / 37) | Any:<br>p = 0.89<br>q = 0.99 | p = 0.91<br>q = 0.99 | p = 0.42<br>q = 0.83 |
|  | HER2-<br>(28 / 85) | Any:<br>p = 0.11<br>q = 0.98 | p = 0.92<br>q = 0.98 | p = 0.42<br>q = 0.98 |

**Table S3.** Association of *SETD7* differentially expression and known *SETD7* targets and their methylation sites and other sites known to compete with *SETD7* methylation. Significant associations are highlighted in bold (Benjamini-Hochberg q-val  $\leq 0.05$  and  $|\log FC| < 0.4$ ). NA – not available; NS – not significant.

| Protein<br>(gene)                     | Methylation site            | Competing processes<br>(sites) | TCGA PanCancer<br>(RPPA)       |                             | CPTAC- protein<br>(LC -MS/MS) |                                                                             |                       |
|---------------------------------------|-----------------------------|--------------------------------|--------------------------------|-----------------------------|-------------------------------|-----------------------------------------------------------------------------|-----------------------|
|                                       |                             |                                | Overall<br>(n = 541 /<br>1084) | Luminal A<br>(n = 249 /499) | Overall (n = 60 / 122)        |                                                                             |                       |
|                                       |                             |                                |                                |                             | Acetylproteome                | Phosphoproteome                                                             | Total<br>Proteome     |
| AKAP-6<br>( <i>AKAP6</i> )            | K604 [1]                    | -                              | NA                             | NA                          | NA                            | NS<br>(AKAP6_S1007s)                                                        | NA                    |
| Androgen<br>Receptor<br>( <i>AR</i> ) | K630 [2]<br>and K632<br>[3] | -                              | <b>High SETD7<br/>(AR)</b>     | NS (AR)                     | NA                            | <b>High SETD7<br/>(AR_S310s,<br/>AR_S651s)</b><br>NS (AR_S516s,<br>AR_S96s) | <b>High<br/>SETD7</b> |
| Catenin beta-<br>1 ( <i>CTNNB1</i> )  | K180 [4]                    | -                              | NS*<br>(CTNNB1)                | NS*<br>(CTNNB1)             | NA                            | <b>Low SETD7<br/>(CTNNB1_S191s)</b>                                         | NS                    |

|                                                                |          |   |    |    |    |                                                                                                                                                                                                                                                                                        |                  |
|----------------------------------------------------------------|----------|---|----|----|----|----------------------------------------------------------------------------------------------------------------------------------------------------------------------------------------------------------------------------------------------------------------------------------------|------------------|
|                                                                |          |   |    |    |    | NS<br>(CTNNB1_S179s,<br>CTNNB1_S389s_S<br>425s_T428t,<br>CTNNB1_T42t,<br>CTNNB1_S552s,<br>CTNNB1_S675s)                                                                                                                                                                                |                  |
| Centromere<br>protein C<br>( <i>CENPC</i> /<br><i>CENPC1</i> ) | K414 [1] | - | NA | NA | NA | <b>Low SETD7</b><br>( <i>CENPC_S177s</i> ,<br><i>CENPC_S225s</i> ,<br><i>CENPC_S538s</i> ,<br><i>CENPC_S709s_S7</i><br><i>10s</i> , <i>CENPC_S73s</i> ,<br><i>CENPC_S773s</i> ,<br><i>CENPC_T130t</i> ,<br><i>CENPC_T734t</i> )<br>NS ( <i>CENPC_S528s</i> ,<br><i>CENPC_S763s_S77</i> | <b>Low SETD7</b> |

|                             |          |   |    |    |                                  |                                                                                                                                  |           |
|-----------------------------|----------|---|----|----|----------------------------------|----------------------------------------------------------------------------------------------------------------------------------|-----------|
|                             |          |   |    |    |                                  | 3s, CENPC_S384s,<br>CENPC_S709s_S71<br>0s_S713s,<br>CENPC_S620s,<br>CENPC_S333s,<br>CENPC_S316s,<br>CENPC_S276s,<br>CENPC_S709s) |           |
| Cullin 1<br>( <i>CUL1</i> ) | K73 [1]  | - | NA | NA | NA                               | NA                                                                                                                               | Low SETD7 |
| Dnmt1<br>( <i>DNMT1</i> )   | K142 [5] | - | NA | NA | NS (DNMT1_K189k,<br>DNMT1_K973k) | Low SETD7<br>(DNMT1_S1105s,<br>DNMT1_S127s,<br>DNMT1_S154s,<br>DNMT1_S398s,<br>DNMT1_S714s,<br>DNMT1_S732s,<br>DNMT1_T253t)      | Low SETD7 |



|                             |          |                                          |                                                    |                                                     |                 |                                                                                                                              |    |
|-----------------------------|----------|------------------------------------------|----------------------------------------------------|-----------------------------------------------------|-----------------|------------------------------------------------------------------------------------------------------------------------------|----|
|                             |          |                                          |                                                    |                                                     |                 | NS<br>(DNMT1_T328t,<br>DNMT1_S6s,<br>DNMT1_S143s,<br>DNMT1_S141s_S1<br>43s,<br>DNMT1_T166t,<br>DNMT1_S1447s,<br>DNMT1_S312s) |    |
| ER $\alpha$ ( <i>ESR1</i> ) | K302 [6] | -                                        | <b>High SETD7<br/>(ESR1)</b><br>NS<br>(ESR1_PS118) | <b>High SETD7<br/>(ESR1)</b><br>NS*<br>(ESR1_PS118) | NS (ESR1_K171k) | <b>High SETD7<br/>(ESR1_S296s)</b><br>NS (ESR1_S167s)                                                                        | NS |
| E2F-1 ( <i>E2F1</i> )       | K185 [7] | Phosphor<br>ylation<br>(S31 and<br>S364) | NA                                                 | NA                                                  | NA              | NS (E2F1_S375s,<br>E2F1_S307s)                                                                                               | NA |

|                                          |             |                                       |                                                           |  |                                                |                                                                                                                                                                                                                                                                                                 |    |
|------------------------------------------|-------------|---------------------------------------|-----------------------------------------------------------|--|------------------------------------------------|-------------------------------------------------------------------------------------------------------------------------------------------------------------------------------------------------------------------------------------------------------------------------------------------------|----|
|                                          |             | Acetylation (K117, K120 and K125) [8] |                                                           |  |                                                |                                                                                                                                                                                                                                                                                                 |    |
| Forkhead box protein O3 ( <i>FOXO3</i> ) | K271 [9,10] | -                                     | NS* ( <i>FOXO3</i> )<br>NS<br>( <i>FOXO3</i> _PS318_S321) |  | NS ( <i>FOXO3</i> _K259k, <i>FOXO3</i> _K242k) | NS ( <i>FOXO3</i> _S555s, <i>FOXO3</i> _S253s, <i>FOXO3</i> _S413s, <i>FOXO3</i> _T433t, <i>FOXO3</i> _S55s, <i>FOXO3</i> _S294s_S300s, <i>FOXO3</i> _S284s, <i>FOXO3</i> _S311s, <i>FOXO3</i> _S294s, <i>FOXO3</i> _T32t, <i>FOXO3</i> _T433t_S439s, <i>FOXO3</i> _S215s, <i>FOXO3</i> _S280s, | NS |

|                                                       |                             |   |    |    |                       |                                                                                                                                                                                                |                   |
|-------------------------------------------------------|-----------------------------|---|----|----|-----------------------|------------------------------------------------------------------------------------------------------------------------------------------------------------------------------------------------|-------------------|
|                                                       |                             |   |    |    |                       | FOXO3_T427t,<br>FOXO3_S300s)                                                                                                                                                                   |                   |
| Transcription<br>al activator<br>GLI3 ( <i>GLI3</i> ) | K436 and<br>K595 [11]       | - | NA | NA | NA                    | <b>High SETD7</b><br>( <b>GLI3_S1006s,</b><br><b>GLI3_S445s</b> )<br>NS (GLI3_S980s,<br>GLI3_S849s,<br>GLI3_S664s,<br>GLI3_S313s,<br>GLI3_S907s,<br>GLI3_S865s,<br>GLI3_S877s,<br>GLI3_S1038s) | <b>High SETD7</b> |
| Hif1-alpha<br>( <i>HIF1A</i> )                        | K32 [12]                    | - | NA | NA | NS (HIF1A_K733k)      | NS (HIF1A_S475s)                                                                                                                                                                               | NA                |
| HIV Tat-<br>specific factor<br>1                      | K51 [13]<br>and K71<br>[14] | - | NA | NA | NS<br>(HTATSF1_K661k) | <b>Low SETD7</b><br>( <b>HTATSF1_S702s,</b><br><b>HTATSF1_S713s,</b>                                                                                                                           | <b>Low SETD7</b>  |

|           |  |  |  |  |  |                                                                                                                                                                                                                                                                                       |  |
|-----------|--|--|--|--|--|---------------------------------------------------------------------------------------------------------------------------------------------------------------------------------------------------------------------------------------------------------------------------------------|--|
| (HTATSF1) |  |  |  |  |  | HTATSF1_S521s,<br>HTATSF1_S676s,<br>HTATSF1_S494s,<br>HTATSF1_S616s_<br>S624s,<br>HTATSF1_S494s_<br>S498s,<br>HTATSF1_S521s_<br>S529s,<br>HTATSF1_S713s_<br>S714s,<br>HTATSF1_S721s,<br>HTATSF1_S529s,<br>HTATSF1_S481s,<br>HTATSF1_S616s,<br>HTATSF1_S600s)<br>NS<br>(HTATSF1_S624s, |  |
|-----------|--|--|--|--|--|---------------------------------------------------------------------------------------------------------------------------------------------------------------------------------------------------------------------------------------------------------------------------------------|--|

|  |  |  |  |  |  |                                                                                                                                                                                                                                                                                                     |  |
|--|--|--|--|--|--|-----------------------------------------------------------------------------------------------------------------------------------------------------------------------------------------------------------------------------------------------------------------------------------------------------|--|
|  |  |  |  |  |  | HTATSF1_S597s_S<br>600s,<br>HTATSF1_S407s,<br>HTATSF1_T633t,<br>HTATSF1_S498s,<br>HTATSF1_S387s,<br>HTATSF1_S445s_S<br>452s_S453s,<br>HTATSF1_S85s_S4<br>98s,<br>HTATSF1_S713s_S<br>714s_S721s,<br>HTATSF1_S561s,<br>HTATSF1_S479s,<br>HTATSF1_S485s,<br>HTATSF1_S453s,<br>HTATSF1_S452s_S<br>453s, |  |
|--|--|--|--|--|--|-----------------------------------------------------------------------------------------------------------------------------------------------------------------------------------------------------------------------------------------------------------------------------------------------------|--|

|                       |          |   |    |    |    |                                                                                                                                                                                                                                                                                   |    |
|-----------------------|----------|---|----|----|----|-----------------------------------------------------------------------------------------------------------------------------------------------------------------------------------------------------------------------------------------------------------------------------------|----|
|                       |          |   |    |    |    | HTATSF1_S544s,<br>HTATSF1_S241s,<br>HTATSF1_S616s_S<br>624s_T633t,<br>HTATSF1_S403s_S<br>407s,<br>HTATSF1_S642s,<br>HTATSF1_S579s,<br>HTATSF1_S387s_S<br>389s,<br>HTATSF1_S445s,<br>HTATSF1_S702s_S<br>713s,<br>HTATSF1_359s,<br>HTATSF1_S597s_S<br>600s_S607s,<br>HTATSF1_S403s) |    |
| IRF-1 ( <i>IRF1</i> ) | K126 [1] | - | NA | NA | NA | NA                                                                                                                                                                                                                                                                                | NA |

|                                                                                                       |                                          |   |    |    |                                                                                                                       |                                                                                                                         |    |
|-------------------------------------------------------------------------------------------------------|------------------------------------------|---|----|----|-----------------------------------------------------------------------------------------------------------------------|-------------------------------------------------------------------------------------------------------------------------|----|
| Histone acetyltransferase KAT2B ( <i>KAT2B</i> / <i>PCAF</i> )                                        | K78, K89, K638, K671, K672 and K692 [15] | - | NA | NA | NA                                                                                                                    | NA                                                                                                                      | NA |
| KH domain-containing, RNA-binding, signal transduction-associated protein 1, Sam68 ( <i>KHDRBS1</i> ) | K208 [16]                                | - | NA | NA | <b>Low SETD7 (KHDRBS1_K169k, KHDRBS1_K175k)</b><br>NS<br>(KHDRBS1_K152k, KHDRBS1_K165k, KHDRBS1_K139k, KHDRBS1_K194k) | NS<br>(KHDRBS1_S20s, KHDRBS1_S35s, KHDRBS1_S58s, KHDRBS1_S137s, KHDRBS1_T33t, KHDRBS1_T61t, KHDRBS1_S90s, KHDRBS1_T84t) | NS |
| Protein lin-28 homolog A ( <i>LIN28A</i> )                                                            | K135 [17]                                | - | NA | NA | NA                                                                                                                    | NA                                                                                                                      | NA |

|                  |          |   |    |    |                                                                                                                |                                                                                                                                                                                                                                                                                                   |    |
|------------------|----------|---|----|----|----------------------------------------------------------------------------------------------------------------|---------------------------------------------------------------------------------------------------------------------------------------------------------------------------------------------------------------------------------------------------------------------------------------------------|----|
| MeCp2<br>(MECP2) | K347 [1] | - | NA | NA | NS (MECP2_K222k,<br>MECP2_K461k,<br>MECP2_K333k,<br>MECP2_K231k<br>MECP2_K343k,<br>MECP2_K316k,<br>MECP2_K34k) | <b>High SETD7</b><br><b>(MECP2_S286s,</b><br><b>MECP2_T323t,</b><br><b>MECP2_T323t_S32</b><br><b>5s)</b><br>NS (MECP2_S325s,<br>MECP2_T240s,<br>MECP2_S92s,<br>MECP2_S176s,<br>MECP2_S25s,<br>MECP2_S435s,<br>MECP2_S82s,<br>MECP2_S372s,<br>MECP2_413s,<br>MECP2_161s,<br>MECP2_S368s_S37<br>2s) | NS |
|------------------|----------|---|----|----|----------------------------------------------------------------------------------------------------------------|---------------------------------------------------------------------------------------------------------------------------------------------------------------------------------------------------------------------------------------------------------------------------------------------------|----|



|                                                                                                         |           |   |    |    |                                                                                                                                                                   |                                                                                                                                                                                                                                                                                                             |  |
|---------------------------------------------------------------------------------------------------------|-----------|---|----|----|-------------------------------------------------------------------------------------------------------------------------------------------------------------------|-------------------------------------------------------------------------------------------------------------------------------------------------------------------------------------------------------------------------------------------------------------------------------------------------------------|--|
| Mediator of<br>RNA<br>polymerase II<br>transcription<br>subunit 1<br>( <i>MED1</i> /<br><i>PPARBP</i> ) | K1006 [1] | - | NA | NA | Low SETD7<br>( <b>MED1_K699k</b> )<br>NS (MED1_K2k,<br>MED1_K1210k,<br>MED1_K1529k,<br>MED1_K1309k,<br>MED1_K1126k,<br>MED1_K994k,<br>MED1_K1354k,<br>MED1_K991k) | Low SETD7<br>( <b>MED1_S1207s,</b><br><b>MED1_S1207s_T1</b><br><b>215t</b> )<br>NS<br>(MED1_S1481s_S1<br>482s,<br>MED1_S1463s,<br>MED1_T1215t,<br>MED1_S1453s_S14<br>63s, MED1_S1479s,<br>MED1_T1051t,<br>MED1_S1463s_S14<br>65s, MED1_S588s,<br>MED1_S1302s,<br>MED1_S1192s,<br>MED1_S1251,<br>MED1_T628t, |  |
|---------------------------------------------------------------------------------------------------------|-----------|---|----|----|-------------------------------------------------------------------------------------------------------------------------------------------------------------------|-------------------------------------------------------------------------------------------------------------------------------------------------------------------------------------------------------------------------------------------------------------------------------------------------------------|--|

|                                                           |           |   |    |    |    |                                                                                                                                                                                                                                         |    |
|-----------------------------------------------------------|-----------|---|----|----|----|-----------------------------------------------------------------------------------------------------------------------------------------------------------------------------------------------------------------------------------------|----|
|                                                           |           |   |    |    |    | MED1_S1433s_T14<br>40t,<br>MED1_S1479s_S14<br>81s_S1482S,<br>MED1_S1156s,<br>MED1_S953s,<br>MED1_S1437s,<br>MED1_T1017t_T10<br>32t, MED1_S1130s,<br>MED1_S664s,<br>MED1_T1051t_T10<br>57t, MED1_S1433s,<br>MED1_S1401s,<br>MED1_S1023s) |    |
| Bile acid<br>receptor<br>( <i>NR1H4</i> /<br><i>FXR</i> ) | K206 [18] | - | NA | NA | NA | NA                                                                                                                                                                                                                                      | NA |

|                            |           |   |    |    |                                                                                                                                                                                                                                                                                                                                                              |                                                                                                                            |                  |
|----------------------------|-----------|---|----|----|--------------------------------------------------------------------------------------------------------------------------------------------------------------------------------------------------------------------------------------------------------------------------------------------------------------------------------------------------------------|----------------------------------------------------------------------------------------------------------------------------|------------------|
| PARP-1<br>( <i>PARP1</i> ) | K508 [19] | - | NA | NA | <b>Low SETD7</b><br><b>(PARP1_K621k,</b><br><b>PARP1_K400k,</b><br><b>PARP1_K662k,</b><br><b>PARP1_K108k,</b><br><b>PARP1_K633k,</b><br><b>PARP1_K418k,</b><br><b>PARP1_K105k,</b><br><b>PARP1_K134k)</b><br>NS (PARP1_K700k,<br>PARP1_K637k,<br>PARP1_K796k,<br>PARP1_K600k,<br>PARP1_K433k,<br>PARP1_K683k,<br>PARP1_K654k,<br>PARP1_K221k,<br>PARP1_K84k, | <b>Low SETD7</b><br><b>(PARP1_S179s,</b><br><b>PARP1_S782s,</b><br><b>PARP1_T368t)</b><br>NS (PARP1_S519s,<br>PARP1_S257s) | <b>Low SETD7</b> |
|----------------------------|-----------|---|----|----|--------------------------------------------------------------------------------------------------------------------------------------------------------------------------------------------------------------------------------------------------------------------------------------------------------------------------------------------------------------|----------------------------------------------------------------------------------------------------------------------------|------------------|

|                                                                              |                       |   |    |    |                                                                                                              |                                                                                                                                                                |                      |
|------------------------------------------------------------------------------|-----------------------|---|----|----|--------------------------------------------------------------------------------------------------------------|----------------------------------------------------------------------------------------------------------------------------------------------------------------|----------------------|
|                                                                              |                       |   |    |    | PARP1_K518k,<br>PARP1_K119k,<br>PARP1_K521k,<br>PARP1_K505k,<br>PARP1_K148k,<br>PARP1_K192k,<br>PARP1_K548k) |                                                                                                                                                                |                      |
| PDX-1<br>( <i>PDX1</i> )                                                     | K123 and<br>K131 [20] | - | NA | NA | NA                                                                                                           | NA                                                                                                                                                             | NA                   |
| PGC-1-alpha<br>( <i>PPARGC1A</i> )                                           | K779 [21]             | - | NA | NA | NA                                                                                                           | NA                                                                                                                                                             | NA                   |
| Protein<br>phosphatase<br>1 regulatory<br>subunit 12A<br>( <i>PPP1R12A</i> ) | K442 [22]             | - | NA | NA | NA                                                                                                           | <b>Low</b> SETD7<br>( <i>PPP1R12A_S422s</i> )<br><b>High</b> SETD7<br>( <i>PPP1R12A_S427s</i><br>_S473s,<br><i>PPP1R12A_S479s</i> ,<br><i>PPP1R12A_S507s</i> , | <b>High</b><br>SETD7 |

|  |  |  |  |  |  |                                                                                                                                                                                                                                                                                                                                                      |  |
|--|--|--|--|--|--|------------------------------------------------------------------------------------------------------------------------------------------------------------------------------------------------------------------------------------------------------------------------------------------------------------------------------------------------------|--|
|  |  |  |  |  |  | <p>PPP1R12A_S618s,<br/>PPP1R12A_S554s,<br/>PPP1R12A_S668s,<br/>PPP1R12A_S695s,<br/>PPP1R12A_S862s,<br/>PPP1R12A_S862s_<br/>S871s,<br/>PPP1R12A_S910s,<br/>PPP1R12A_T443t)<br/>NS<br/>(PPP1R12A_S445s,<br/>PPP1R12A_S292s,<br/>PPP1R12A_S995s,<br/>PPP1R12A_S903s,<br/>PPP1R12A_T853,<br/>PPP1R12A_S477s,<br/>PPP1R12A_S409s,<br/>PPP1R12A_S507s_</p> |  |
|--|--|--|--|--|--|------------------------------------------------------------------------------------------------------------------------------------------------------------------------------------------------------------------------------------------------------------------------------------------------------------------------------------------------------|--|

|                    |                              |                                                |                             |                            |    |                                                                                                                                                                                                                              |  |
|--------------------|------------------------------|------------------------------------------------|-----------------------------|----------------------------|----|------------------------------------------------------------------------------------------------------------------------------------------------------------------------------------------------------------------------------|--|
|                    |                              |                                                |                             |                            |    | T508t,<br>PPP1R12A_T524st,<br>PPP1R12A_T853t_<br>S682s_S871s,<br>PPP1R12A_S509s,<br>PPP1R12A_S608s,<br>PPP1R12A_S299s,<br>PPP1R12A_S527s,<br>PPP1R12A_T406t_<br>S409s,<br>PPP1R12A_S356s_<br>S357s_S365s,<br>PPP1R12A_T305t) |  |
| pRb ( <i>RB1</i> ) | K810 [23]<br>ad K873<br>[24] | Phosphor<br>ylation<br>(S807 and<br>S811) [23] | NS*<br>(RB1_PS807_<br>S811) | NS<br>(RB1_PS807_<br>S811) | NA | <b>High SETD7</b><br><b>(RB1_T601t)</b><br>NS (RB1_T841t,<br>RB1_Y805yS807s,<br>RB1_S780s_S788s,                                                                                                                             |  |

|                                                             |                                    |   |    |    |                                                                        |                                                                                                                                                                                       |    |
|-------------------------------------------------------------|------------------------------------|---|----|----|------------------------------------------------------------------------|---------------------------------------------------------------------------------------------------------------------------------------------------------------------------------------|----|
|                                                             |                                    |   |    |    |                                                                        | RB1_T356t,<br>RB1_S37s,<br>RB1_S807s,<br>RB1_S249s,<br>RB1_T373t,<br>RB1_T601t_S612s,<br>RB1_S780s,<br>RB1_S795s,<br>RB1_T821t_T826t,<br>RB1_T826t,<br>RB1_T821t,<br>RB1_S249s_T252t) |    |
| Transcription<br>factor p65,<br>NFkB-p65<br>( <i>RELA</i> ) | K37 [25],<br>K315 and<br>K316 [26] | - | NA | NA | NS ( <i>RELA</i> _K122k,<br><i>RELA</i> _K195k,<br><i>RELA</i> _K310k) | <b>High SETD7</b><br><b>(<i>RELA</i>_S205s)</b><br>NS ( <i>RELA</i> _S238s,<br><i>RELA</i> _S338s,<br><i>RELA</i> _S45s)                                                              | NS |

|                                                       |                                |                             |    |    |    |                                                                             |                  |
|-------------------------------------------------------|--------------------------------|-----------------------------|----|----|----|-----------------------------------------------------------------------------|------------------|
| Serine/threonine-protein kinase RIO1 ( <i>RIOK1</i> ) | K411 [27]                      | Phosphorylation (T410) [27] | NA | NA | NA | <b>Low SETD7 (RIOK1_S21s_S22s, RIOK1_S22s)</b><br>NS (RIOK1_S21s_S22s_S24s) | <b>Low SETD7</b> |
| Nuclear receptor ROR-alpha ( <i>RORA</i> )            | K87 [28]                       | -                           | NA | NA | NA | NS (RORA_S49s)                                                              | NA               |
| 60S ribosomal protein L29 ( <i>RPL29</i> )            | K5 [29]                        | -                           | NA | NA | NA | NS (RPL29_S142s, RPL29_S158s)                                               | NS               |
| hSIRT1 ( <i>SIRT1</i> )                               | K233, K235, K236 and K238 [30] | -                           | NA | NA | NA | NS (SIRT1_T719t, SIRT1_S47s, SIRT1_S27s, SIRT1_S14s, SIRT1_747s,            | NS               |



|                                                                         |           |   |    |    |                         |                                                                                                                                                                                                                          |    |
|-------------------------------------------------------------------------|-----------|---|----|----|-------------------------|--------------------------------------------------------------------------------------------------------------------------------------------------------------------------------------------------------------------------|----|
|                                                                         |           |   |    |    |                         | SIRT1_S615s,<br>SIRT1_S14s_S16s)                                                                                                                                                                                         |    |
| Mothers<br>against<br>decapentaple<br>gic homolog 7<br>( <i>SMAD7</i> ) | K70 [31]  | - | NA | NA | NA                      | NA                                                                                                                                                                                                                       | NA |
| Transcription<br>factor SOX-2<br>( <i>SOX2</i> )                        | K119 [32] | - | NA | NA | NA                      | NA                                                                                                                                                                                                                       | NA |
| Msx2-<br>interacting<br>protein<br>( <i>SPEN</i> /<br><i>MINT</i> )     | K2076 [1] | - | NA | NA | NS ( <i>SPEN_K21k</i> ) | <b>High</b> <b>SETD7</b><br>( <i>SPEN_S1425s</i> )<br><b>Low</b> <b>SETD7</b><br>( <i>SPEN_S1636s</i> ,<br><i>SPEN_S2114s_S21</i><br><i>26s</i> , <i>SPEN_S2120s</i> ,<br><i>SPEN_S2126s</i> ,<br><i>SPEN_S736s_S740</i> | NS |

|  |  |  |  |  |  |                                                                                                                                                                                                                                                                                                                               |  |
|--|--|--|--|--|--|-------------------------------------------------------------------------------------------------------------------------------------------------------------------------------------------------------------------------------------------------------------------------------------------------------------------------------|--|
|  |  |  |  |  |  | s, SPEN_S749s,<br>SPEN_T1633t_S16<br>36s, SPEN_T2393t,<br>SPEN_T2421t)<br>NS (SPEN_S2412s,<br>SPEN_T1910t,<br>SPEN_1619t_S1622<br>s, SPEN_S1252s,<br>SPEN_S1222s,<br>SPEN_T3467t,<br>SPEN_T3139t,<br>SPEN_S1380s_S138<br>2s, SPEN_S1918s,<br>SPEN_T1619t,<br>SPEN_T1947t,<br>SPEN_S2366s,<br>SPEN_T1140t,<br>SPEN_S725s_S727s |  |
|--|--|--|--|--|--|-------------------------------------------------------------------------------------------------------------------------------------------------------------------------------------------------------------------------------------------------------------------------------------------------------------------------------|--|

|  |  |  |  |  |  |                                                                                                                                                                                                                                                                                                      |  |
|--|--|--|--|--|--|------------------------------------------------------------------------------------------------------------------------------------------------------------------------------------------------------------------------------------------------------------------------------------------------------|--|
|  |  |  |  |  |  | , SPEN_S727s,<br>SPEN_S1857,<br>SPEN_S1287s,<br>SPEN_S1283s_S128<br>7s, SPEN_S623s,<br>SPEN_S3433s,<br>SPEN_S1278s,<br>SPEN_S2101s,<br>SPEN_S2466s,<br>SPEN_S190s_2,<br>SPEN_S2159s,<br>SPEN_S1268s,<br>SPEN_S190s_1,<br>SPEN_S736s,<br>SPEN_S1261s,<br>SPEN_T3236t,<br>SPEN_S2493s,<br>SPEN_T2918t, |  |
|--|--|--|--|--|--|------------------------------------------------------------------------------------------------------------------------------------------------------------------------------------------------------------------------------------------------------------------------------------------------------|--|

|                                                                     |                    |   |                  |                  |                                                                 |                                                                         |    |
|---------------------------------------------------------------------|--------------------|---|------------------|------------------|-----------------------------------------------------------------|-------------------------------------------------------------------------|----|
|                                                                     |                    |   |                  |                  |                                                                 | SPEN_S1268s_S1278s, SPEN_S1062s, SPEN_S1380s, SPEN_T1826t, SPEN_S1006s) |    |
| Signal transducer and activator of transcription 3 ( <i>STAT3</i> ) | K140 [33]          | - | NS (STAT3_PY705) | NS (STAT3_PY705) | <b>Low SETD7 (STAT3_K631k)</b><br>NS (STAT3_K370k, STAT3_K383k) | NA                                                                      | NS |
| Histone-lysine N-methyltransferase SUV39H1 ( <i>SUV39H1</i> )       | K105 and K123 [34] | - | NA               | NA               | NA                                                              | <b>Low SETD7 (SUV39H1_S402s)</b>                                        | NS |

|                                                                   |           |   |            |    |                        |                                                                                                  |                  |
|-------------------------------------------------------------------|-----------|---|------------|----|------------------------|--------------------------------------------------------------------------------------------------|------------------|
| Transcription initiation factor TFIID subunit 7 ( <i>TAF7</i> )   | K5 [35]   | - | NA         | NA | NS (TAF7_K291k)        | <b>Low SETD7 (TAF7_T274t)</b><br>NS (TAF7_S201s, TAF7_S171s, TAF7_S213s, TAF7_S264s, TAF7_S159s) | NS               |
| Transcription initiation factor TFIID subunit 10 ( <i>TAF10</i> ) | K189 [36] | - | NA         | NA | NA                     | NS (TAF10_S44s)                                                                                  | NS*              |
| Cellular tumor antigen p53 ( <i>TP53</i> )                        | K372 [37] | - | NS* (TP53) | NS | NS (TP53_K381k_K382k ) | NS (TP53_S315s, TP53_S367s, TP53_S15s, TP53_S392s)                                               | NS               |
| Dual specificity                                                  | K708 [1]  | - | NA         | NA | NA                     | NA                                                                                               | <b>Low SETD7</b> |

|                                                         |           |   |                           |                                      |                               |                                                                                                                                                                                                                                                                         |                             |
|---------------------------------------------------------|-----------|---|---------------------------|--------------------------------------|-------------------------------|-------------------------------------------------------------------------------------------------------------------------------------------------------------------------------------------------------------------------------------------------------------------------|-----------------------------|
| protein<br>kinase TTK<br>( <i>TTK</i> / <i>MPS1</i> )   |           |   |                           |                                      |                               |                                                                                                                                                                                                                                                                         |                             |
| Transcription<br>al coactivator<br>YAP1 ( <i>YAP1</i> ) | K494 [38] | - | NS* (YAP1,<br>YAP1_PS127) | NS (YAP1)<br>NS*<br>(YAP1_PS127<br>) | NS (YAP1_K97k,<br>YAP1_K346k) | <b>High SETD7</b><br><b>(YAP1_S109s_T11</b><br><b>0t, YAP1_S128s,</b><br><b>YAP1_S164s,</b><br><b>YAP1_S386s,</b><br><b>YAP1_T365t)</b><br>NS (YAP1_S109s,<br>YAP1_S131_T143t,<br>YAP1_S289s,<br>YAP1_T432t,<br>YAP1_S274s,<br>YAP1_S61s,<br>YAP1_S276s,<br>YAP1_S217s, | <b>High</b><br><b>SETD7</b> |

|                                                       |                       |   |    |    |                                                                 |                                                                         |    |
|-------------------------------------------------------|-----------------------|---|----|----|-----------------------------------------------------------------|-------------------------------------------------------------------------|----|
|                                                       |                       |   |    |    |                                                                 | YAP1_S229s,<br>YAP1_S344s)                                              |    |
| Transcription<br>al repressor<br>protein YY1<br>(YY1) | K173 and<br>K411 [39] | - | NA | NA | <b>Low</b> <b>SETD7</b><br><b>(YY1_K339k)</b><br>NS (YY1_K351k) | <b>Low</b> <b>SETD7</b><br><b>(YY1_S118s)</b><br>NS (YY1_S187s)         | NS |
| Transcription<br>factor YY2<br>(YY2)                  | 247 [40]              | - | NA | NA | NA                                                              | NA                                                                      | NA |
| Palmitoyltran<br>sferase<br>ZDHHC8<br>(ZDHHC8)        | K300 [1]              | - | NA | NA | NA                                                              | NS<br>(ZDHHC8_S606s,<br>ZDHHC8_S526s,<br>ZDHHC8_S453s,<br>ZDHHC8_S675s) | NA |

\* not significant because  $|\log_{FC}| < 0.4$

**Table S4.** SETD7 association with survival outcomes. Significant values are highlighted in bold and strong tendencies (p-val ≤ 0.1) are shown in italic. Log rank test. BC – Breast Cancer, **CI – Confidence Interval**, DE – Differential Expression, DFS – Disease Free Survival, DSFS – Disease-Specific Free Survival, HPA – Huma Protein Atlas, **HR – Hazard Ratio**, OS – Overall survival, PFS – Progression Free Survival, PPS – Palliative Performance Score, RFS – Recurrence Free Survival, DMFS – Distant Metastasis Free Survival.

| Online tool       | Type of data | Dataset (additional information)    | PAM50 Subtypes (lumA / lumB / Her2-enriched / basal / normal-like) | nSETD7 DE / nTotal samples | Survival | p-value      | <b>HR (CI) / Prognosis associated with high SETD7</b> |
|-------------------|--------------|-------------------------------------|--------------------------------------------------------------------|----------------------------|----------|--------------|-------------------------------------------------------|
| <b>KM plotter</b> | Gene chip    | All (E-MTAB-365 and 13 GEO studies) | 631 / 566 / 358 / 442 / 35                                         | 1015 / 2032                | RFS      | 0.96         | 1.01 (0.81 – 1.25)                                    |
|                   |              | All (7 GEO studies)                 | 259 / 183 / 218 / 283 / 15                                         | 482 / 958                  | DMFS     | 0.25         | 0.79 (0.54 – 1.18)                                    |
|                   |              | All (7 GEO studies)                 | 222 / 200 / 198 / 296 / 27                                         | 473 / 943                  | OS       | 0.066        | 0.69 (0.46 – 1.03)<br><i>Good</i>                     |
|                   |              | All (3 GEO studies)                 | 36 / 53 / 47 / 38 / 6                                              | 90 / 108                   | PPS      | <b>0.007</b> | <b>0.49 (0.29 – 0.83)</b><br><b>Good</b>              |
|                   |              | E-MTAB-365                          | 174 / 149 / 53 / 49 / 1                                            | 212 / 426                  | RFS      | 0.57         | 0.86 (0.52 – 1.43)                                    |



|  |  |                                                                                              |                       |           |            |       |                                   |
|--|--|----------------------------------------------------------------------------------------------|-----------------------|-----------|------------|-------|-----------------------------------|
|  |  | GSE12276<br>(tumours with known site of relapse – focus on brain)                            | 34 / 72 / 38 / 59 / 1 | 104 / 204 | RFS        | 0.13  | 0.74 (0.5 – 1.09)                 |
|  |  | GSE16391<br>(Primary ER+/PR-/HER2- tumours of endocrine-treated patients, includes relapses) | 27 / 19 / 2 / 0 / 0   | 24 / 48   | RFS        | 0.1   | 5.04 (0.59 – 43.35)<br><i>Bad</i> |
|  |  | GSE16446<br>(Primary ER-negative tumours of anthracycline-treated patients (neoadjuvant))    | 0 / 0 / 34 / 72 / 1   | 54 / 107  | RFS / DMFS | 0.017 | 8.46 (1.05 – 68.32)<br><b>Bad</b> |
|  |  |                                                                                              |                       |           | OS         | 0.25  | 3.46 (0.37 – 32.02)               |
|  |  | GSEE17907<br>(tumours with amplification of the <i>ERBB2</i> locus)                          | 5 / 5 / 24 / 2 / 2    | 20 / 54   | RFS / DMFS | 0.79  | 0.83 (0.21 – 3.34)                |
|  |  | GSE19615                                                                                     | 45 / 23 / 17 / 30 / 0 | 58 / 115  | RFS / DMFS | 0.98  | 1.02 (0.29 – 3.52)                |

|  |  |                                                         |                        |           |            |              |                                          |
|--|--|---------------------------------------------------------|------------------------|-----------|------------|--------------|------------------------------------------|
|  |  | GSE20685                                                | 117 / 91 / 69 / 42 / 8 | 164 / 327 | RFS / DMFS | 0.12         | 0.58 (0.29 – 1.16)                       |
|  |  |                                                         |                        |           | OS         | <b>0.039</b> | <b>0.47 (0.23 – 0.98)</b><br><b>Good</b> |
|  |  |                                                         | 25 / 26 / 20 / 7 / 3   | 40 / 81   | PPS        | <b>0.034</b> | <b>0.47 (0.23 – 0.96)</b><br><b>Good</b> |
|  |  | GSE20711                                                | 16 / 32 / 17 / 23 / 0  | 44 / 90   | RFS        | 0.33         | 1.56 (0.64 – 3.84)                       |
|  |  |                                                         |                        |           | OS         | 0.98         | 1.02 (0.33 – 3.15)                       |
|  |  |                                                         | 4 / 18 / 11 / 9 / 0    | 20 / 42   | PPS        | 0.26         | 0.48 (0.13 – 1.76)                       |
|  |  | GSE21653                                                | 73 / 59 / 21 / 69 / 8  | 116 / 266 | RFS        | 0.58         | 0.83 (0.43 – 1.61)                       |
|  |  | GSE42568                                                | 27 / 28 / 12 / 30 / 7  | 52 / 104  | RFS        | <b>0.02</b>  | <b>0.41 (0.19 – 0.89)</b><br><b>Good</b> |
|  |  |                                                         |                        |           | OS         | <b>0.001</b> | <b>0.22 (0.08 – 0.62)</b><br><b>Good</b> |
|  |  |                                                         | 6 / 8 / 6 / 10 / 3     | 16 / 33   | PPS        | <b>0.031</b> | <b>0.2 (0.04 – 1)</b><br><b>Good</b>     |
|  |  | GSE48390<br>(breast tumours<br>from Taiwanese<br>women) | 27 / 28 / 10 / 8 / 7   | 40 / 109  | RFS        | 0.97         | 1.04 (0.15 – 7.39)                       |
|  |  |                                                         |                        |           | OS         | 0.99         | 1.03 (0.06 – 16.41)                      |
|  |  | GSE58812<br>(triple-negative<br>(IHC))                  | 6 / 4 / 13 / 80 / 4    | 54 / 107  | OS         | 0.55         | 1.38 (0.48 – 3.97)<br><i>Bad</i>         |
|  |  |                                                         |                        |           | DMFS       | 0.96         | 1.03 (0.36 – 2.93)                       |
|  |  | GSE61304                                                | 16 / 15 / 11 / 16 / 0  | 28 / 58   | RFS        | <b>0.009</b> | <b>0.11 (0.01 – 0.83)</b>                |

|                   |           |                                                                                                         |                                                                  |                       |      |              |                                          |
|-------------------|-----------|---------------------------------------------------------------------------------------------------------|------------------------------------------------------------------|-----------------------|------|--------------|------------------------------------------|
|                   |           |                                                                                                         |                                                                  |                       |      |              | <b>Good</b>                              |
|                   |           |                                                                                                         |                                                                  |                       | DMFS | <b>0.042</b> | <b>0.15 (0.02 – 1.23)</b><br><b>Good</b> |
|                   |           |                                                                                                         |                                                                  |                       | RFS  | 0.15         | 625e7 (0 – Inf)                          |
|                   |           | GSE65194                                                                                                | 29 / 17 / 43 / 41 / 0                                            | 63 / 130              | DMFS | 0.84         | 1.15 (0.29 – 4.63)                       |
|                   |           |                                                                                                         |                                                                  |                       | OS   | 0.81         | 1.21 (0.24 – 6.05)                       |
|                   |           |                                                                                                         |                                                                  |                       | RFS  | 0.36         | 0.46 (0.08 – 2.51)                       |
|                   |           | GSE9195<br>(ER+ primary<br>breast tumors of<br>patients treated<br>by Tamoxifen in<br>adjuvant setting) | 41 / 28 / 7 / 1 / 0                                              | 38 / 77               | DMFS | 0.89         | 0.87 (0.12 – 6.19)                       |
|                   |           |                                                                                                         |                                                                  |                       |      |              |                                          |
|                   | RNA-seq   | GSE96058                                                                                                | 1504 / 668 / 295 / 309 / 200                                     | 1486 / 2976           | OS   | <b>0.016</b> | <b>0.68 (0.49 – 0.93)</b><br><b>Good</b> |
|                   | Protein   | Tang_2018                                                                                               | NA                                                               | 65 *                  | OS   | <b>0.014</b> | <b>2.6 (1.18 – 5.75)</b><br><b>Bad</b>   |
| <b>HPA</b>        | RNA-seq   | TCGA                                                                                                    | NA                                                               | 1075 *                | OS   | <b>0.001</b> | <b>Bad</b>                               |
| <b>cBioPortal</b> | Gene chip | METABRIC                                                                                                | 700 / 475 / 224 / 209 / 148<br>(218 claudin-low / 529 NA / 6 NC) | 952 / 2976 (- 605 NA) | OS   | 0.362        |                                          |
|                   |           |                                                                                                         |                                                                  |                       | RFS  | 0.073        | <i>Bad</i>                               |
|                   | RNA-seq   | TCGA<br>PanCancer Atlas                                                                                 | 499 / 197 / 78 / 171 / 36<br>(103 NA)                            | 541 / 1084 (- 2 NA)   | OS   | <b>0.012</b> | <b>Bad</b>                               |
|                   |           |                                                                                                         |                                                                  |                       | PFS  | 0.227        | -                                        |
|                   |           |                                                                                                         |                                                                  |                       | DSFS | 0.273        | -                                        |
|                   |           |                                                                                                         |                                                                  |                       | DFS  | 0.909        | -                                        |
|                   |           |                                                                                                         |                                                                  |                       |      |              |                                          |

\*Differentially expressed method is automatic (by median), for all other analysis samples were divided by high (upper quartile) *vs* low (lower quartile) SETD7 expression.

**Table S5.** Prognosis associated with high *SETD7* in BC subtypes. Significant values are highlighted in bold and strong tendencies (p-val  $\leq 0.1$ ) are shown in parenthesis. Log rank test. DFS – Disease free survival; DMFS – Distant metastasis free survival; DSFS – Disease-specific free survival; NA – not available, either because the number of samples were too low for each subgroup or because KM plotter didn't perform the analysis; OS – overall survival; PFS – Progression free survival; PPS – Palliative performance score; RFS – Recurrence/Relapse free survival.

| Online Tool | Type of data | Datasets    | Survival | Luminal A<br>p-value<br>(nSETD7 DE / nTotal samples) | Luminal B<br>p-value<br>(nSETD7 DE / nTotal samples) | Her2+<br>p-value<br>(nSETD7 DE / nTotal samples) | Basal<br>p-value<br>(nSETD7 DE / nTotal samples) | Normal-like<br>p-value<br>(nSETD7 DE / nTotal samples) | Claudin-low<br>p-value<br>(nSETD7 DE / nTotal samples) |
|-------------|--------------|-------------|----------|------------------------------------------------------|------------------------------------------------------|--------------------------------------------------|--------------------------------------------------|--------------------------------------------------------|--------------------------------------------------------|
| KM plotter  | Gene chip    | All studies | RFS      | 0.89 (317 / 631)                                     | 0.16 (284 / 566)                                     | 0.41 (180 / 358)                                 | <b>0.009 (221 / 442)</b><br><b>Bad</b>           | 0.64 (18 / 35)                                         | -                                                      |

|  |  |            |            |                           |                  |                           |                          |                |   |
|--|--|------------|------------|---------------------------|------------------|---------------------------|--------------------------|----------------|---|
|  |  |            | DMFS       | 0.027 (130 / 259)<br>Good | 0.93 (92 / 183)  | 0.64 (104 / 218)          | 0.27 (142 / 283)         | 0.73 (8 / 15)  | - |
|  |  |            | OS         | 0.41 (112 / 222)          | 0.47 (100 / 200) | 0.091 (100 / 198)         | 0.33 (148 / 296)         | 0.99 (14 / 27) | - |
|  |  |            | PPS        | 0.88 (18 / 36)            | 0.21 (26 / 53)   | 0.065 (24 / 47)<br>(Good) | 0.18 (20 / 38)           | NA (NA / 6)    | - |
|  |  | E-MTAB-365 | RFS        | 0.28 (88 / 174)           | 0.2 (74 / 149)   | 0.59 (26 / 53)            | 0.32 (25 / 49)           | NA (- / 1)     | - |
|  |  | GSE12276   | RFS        | 0.83 (16 / 34)            | 0.14 (36 / 72)   | 0.51 (20 / 38)            | 0.8 (30 / 59)            | NA (- / 1)     | - |
|  |  | GSE16391   | RFS        | 0.14 (14 / 27)            | NA (NA / 19)     | NA (- / 2)                | -                        | -              | - |
|  |  | GSE16446   | RFS / DMFS | -                         | -                | NA (NA / 34)              | 0.029 (36 / 72)<br>Bad   | NA (- / 1)     | - |
|  |  |            | OS         | -                         | -                | NA (NA / 34)              | 0.061 (36 / 72)<br>(Bad) | NA (- / 1)     | - |

|  |  |          |               |                 |                    |                    |                                      |             |   |
|--|--|----------|---------------|-----------------|--------------------|--------------------|--------------------------------------|-------------|---|
|  |  | GSE17907 | RFS /<br>DMFS | NA (NA / 5)     | NA (NA / 5)        | 0.77 (12 /<br>24)  | NA (- / 2)                           | NA (- / 2)  | - |
|  |  | GSE19615 | RFS /<br>DMFS | 0.53 (22/ 45)   | NA (NA /<br>23)    | NA (NA /<br>17)    | 0.14 (16 / 30)                       | -           | - |
|  |  | GSE20685 | RFS /<br>DMFS | 0.21 (58 / 117) | 0.72 (46 / 91)     | 0.86 (34 /<br>69)  | 0.15 (20 / 42)                       | NA (NA / 8) | - |
|  |  |          | OS            | 0.19 (58 / 177) | 0.62 (46 / 91)     | 0.29 (34 /<br>69)  | 0.1 (20 / 42)                        | NA (NA / 8) | - |
|  |  |          | PPS           | 0.93 (12 / 25)  | 0.76 (12 / 26)     | 0.096 (10 /<br>20) | NA (NA / 7)                          | NA (NA / 3) | - |
|  |  | GSE20711 | RFS           | NA (NA / 16)    | 0.57 (16 / 32)     | NA (NA /<br>17)    | <b>0.018 (12 / 23)</b><br><b>Bad</b> | -           | - |
|  |  |          | OS            | NA (NA / 16)    | 0.97 (16 / 32)     | NA (NA /<br>17)    | 0.095 (12 / 23)<br>(Bad)             | -           | - |
|  |  |          | PPS           | NA (NA / 4)     | NA (NA /<br>18)    | NA (NA /<br>11)    | NA (NA / 9)                          | -           | - |
|  |  | GSE21653 | RFS           | 0.66 (36 / 73)  | 0.075 (30 /<br>59) | 0.7 (10 / 21)      | 0.46 (34 / 69)                       | NA (NA / 8) | - |

|  |  |          |      |               |                |              |                           |             |   |
|--|--|----------|------|---------------|----------------|--------------|---------------------------|-------------|---|
|  |  |          |      |               | (Good)         |              |                           |             |   |
|  |  | GSE42568 | RFS  | 0.47 (14 /27) | 0.56 (14 / 28) | NA (NA / 12) | 0.2 (16 / 30)             | NA (NA / 7) | - |
|  |  |          | OS   | 0.14 (14 /27) | 0.1 (14 / 28)  | NA (NA / 12) | 0.063 (16 / 30)<br>(Good) | NA (NA / 7) | - |
|  |  |          | PPS  | NA (NA / 6)   | NA (NA / 8)    | NA (NA / 6)  | NA (NA / 10)              | NA (NA / 3) | - |
|  |  | GSE48390 | RFS  | NA (NA / 27)  | NA (NA / 28)   | NA (NA / 10) | NA (NA / 8)               | NA (NA / 7) | - |
|  |  |          | OS   | NA (NA / 27)  | NA (NA / 28)   | NA (NA / 10) | NA (NA / 8)               | NA (NA / 7) | - |
|  |  | GSE61304 | RFS  | NA (NA / 16)  | NA (NA / 15)   | NA (NA / 11) | NA (NA / 16)              | -           | - |
|  |  |          | DMFS | NA (NA / 16)  | NA (NA / 15)   | NA (NA / 11) | NA (NA / 16)              | -           | - |
|  |  | GSE65194 | RFS  | NA (NA / 29)  | NA (NA / 17)   | NA (NA / 43) | NA (NA 41)                | -           | - |

|            |           |          |      |                   |                                      |                   |                                       |                  |                  |
|------------|-----------|----------|------|-------------------|--------------------------------------|-------------------|---------------------------------------|------------------|------------------|
|            |           |          | DMFS | NA (NA / 29)      | NA (NA / 17)                         | 0.68 (22 / 43)    | <b>0.024 (20 / 41)</b><br><b>Bad</b>  | -                | -                |
|            |           |          | OS   | NA (NA / 29)      | NA (NA / 17)                         | 0.9 (22 / 43)     | <b>0.0052 (20 / 41)</b><br><b>Bad</b> | -                | -                |
|            |           | GSE9195  | RFS  | 0.15 (20 / 41)    | 0.06 (14 / 28)<br>(Bad)              | NA (NA / 7)       | NA (- / 1)                            | -                | -                |
|            |           |          | DMFS | NA (NA / 41)      | <b>0.045 (14 / 28)</b><br><b>Bad</b> | NA (NA / 7)       | NA (- / 1)                            | -                | -                |
|            |           | GSE58812 | OS   | NA (NA / 6)       | NA (NA / 4)                          | NA (NA / 13)      | 0.55 (40 / 80)                        | NA (NA / 4)      | -                |
|            |           |          | DMFS | NA (NA / 6)       | NA (NA / 4)                          | NA (NA / 13)      | 0.81 (40 / 80)                        | NA (NA / 4)      | -                |
|            | RNA-seq   | GSE96058 | OS   | 0.31 (751 / 1504) | 0.14 (334 / 668)                     | 0.95 (149 / 295)  | 0.7 (154 / 309)                       | 0.52 (100 / 200) | -                |
| cBioPortal | Gene chip | METABRIC | OS   | 0.651 (339 / 700) | 0.514 (232 / 475)                    | 0.513 (110 / 224) | 0.879 (99 / 209)                      | 0.435 (70 / 148) | 0.511 (99 / 218) |



|  |         |                            |      |                                   |                   |                           |                            |                          |                  |
|--|---------|----------------------------|------|-----------------------------------|-------------------|---------------------------|----------------------------|--------------------------|------------------|
|  |         |                            | RFS  | 0.721 (339 / 700)                 | 0.111 (231 / 475) | 0.967 (110 / 224)         | 0.830 (99 / 209)           | 0.392 (70 / 148)         | 0.133 (99 / 218) |
|  | RNA-seq | TCGA<br>PanCancer<br>Atlas | OS   | <b>0.044 (249 / 499)<br/>Bad</b>  | 0.712 (99 / 197)  | 0.0959 (39 / 78)<br>(Bad) | 0.456 (85 / 171)           | 0.381 (18 / 36)          | -                |
|  |         |                            | PFS  | <b>0.0319 (249 / 499)<br/>Bad</b> | 0.521 (99 / 197)  | 0.0511 (39 / 78)<br>(Bad) | 0.125 (85 / 171)           | 0.696 (18 / 36)          | -                |
|  |         |                            | DFS  | 0.701 (249 / 499)                 | 0.577 (99 / 197)  | 0.154 (39 / 78)           | 0.0626 (85 / 171)<br>(Bad) | 0.371 (18 / 36)          | -                |
|  |         |                            | DSFS | 0.0785 (249 / 499)<br>(Bad)       | 0.370 (99 / 197)  | 0.169 (39 / 78)           | 0.610 (85 / 171)           | 0.967 (18 / 36)<br>(Bad) | -                |

**Table S6.** Prognosis associated with high *SETD7* in BC considering therapy. Significant values are highlighted in bold (Log rank test p-val  $\leq 0.05$ ). CI – Confidence Interval, DFS – Disease Free Survival; DMFS – Distant metastasis free survival; DSFS – Disease-specific Free Survival; HR – Hazard Ratio, NA – Not Available, either because the number of samples were too low for each subgroup or because KM plotter didn't perform the analysis; OS – Overall Survival; PFS – Progression Free Survival; PPS – Palliative Performance Score; RFS – Recurrence/Relapse Free Survival.

| Online Tool | Type of data | Datasets                        | Survival | No therapy<br>p-value (nSETD7 DE / nTotal samples)<br>HR (CI) / prognosis | Hormone plus<br>Chemotherapy<br>p-value (nSETD7 DE / n Total samples)<br>HR (CI) / prognosis | Hormone therapy<br>p-value (nSETD7 DE / n Total samples)<br>HR (CI) / prognosis | Chemotherapy<br>p-value (nSETD7 DE / n Total samples)<br>HR (CI) / prognosis |
|-------------|--------------|---------------------------------|----------|---------------------------------------------------------------------------|----------------------------------------------------------------------------------------------|---------------------------------------------------------------------------------|------------------------------------------------------------------------------|
| KM plotter  | Gene chip    | All studies reporting treatment | RFS      | 0.18 (32 / 62)<br>0.39 (0.09 – 1.64)                                      | 0.052 (76 / 153)<br>0.33 (0.1 – 1.07)                                                        | 0.99 (90 / 181)<br>0.99 (0.39 – 2.5)                                            | 0.0006 (106 / 211)<br>4.26 (1.73 – 10.5)<br>Bad                              |
|             |              |                                 | DMFS     | 0.81 (4 / 7)<br>1.41 (0.08 – 23.57)                                       | 0.28 (28 / 55)<br>3.24 (0.34 – 31.19)                                                        | 0.3 (51 / 99)<br>0.32 (0.03 – 3.06)                                             | 0.0012 (84 / 168)<br>5.98 (1.75 – 20.47)<br>Bad                              |

|  |  |          |            |                                      |                                     |                                      |                                                                    |
|--|--|----------|------------|--------------------------------------|-------------------------------------|--------------------------------------|--------------------------------------------------------------------|
|  |  |          | OS         | -                                    | -                                   | -                                    | 0.25 (54 / 107)<br>3.46 (0.37 – 32.02)                             |
|  |  | GSE16391 | RFS        | -                                    | NA (NA / 18)<br>-                   | 0.14 (16 / 30)<br>4.5 (0.5 – 40.38)  | -                                                                  |
|  |  | GSE16446 | RFS / DMFS | -                                    | -                                   | -                                    | <b>0.017 (54 / 107)</b><br><b>8.46 (1.05 -68.32)</b><br><b>Bad</b> |
|  |  |          | OS         |                                      |                                     |                                      | 0.25 (54 / 107)<br>3.46 (0.37 – 32.02)                             |
|  |  | GSE17907 | RFS / DMFS | -                                    | NA (NA / 13)                        | NA (NA / 1)                          | 0.6 (12 / 23)<br>0.65 (0.13 – 3.25)                                |
|  |  | GSE19615 | RFS / DMFS | NA (NA / 7)                          | 0.15 (20 / 42)<br>171e7 (0 – Inf)   | NA (NA / 21)                         | 0.15 (20 / 38)<br>4.41 (0.49 – 39.51)                              |
|  |  | GSE21653 | RFS        | 0.16 (28 / 55)<br>0.31 (0.06 – 1.73) | 0.13 (40 / 80)<br>0.41 (0.12 -1.35) | 0.89 (26 / 52)<br>1.12 (0.22 – 5.61) | 0.13 (22 / 43)<br>2.8 (0.69 – 11.29)                               |
|  |  | GSE9195  | RFS        | -                                    | -                                   | 0.36 (38 / 77)<br>0.46 (0.08 – 2.51) | -                                                                  |
|  |  |          | DMFS       | -                                    | -                                   | 0.89 (38 / 77)                       | -                                                                  |

|            |           |                            |     |                                                        |                                         |                                        |                                                       |
|------------|-----------|----------------------------|-----|--------------------------------------------------------|-----------------------------------------|----------------------------------------|-------------------------------------------------------|
|            |           |                            |     |                                                        |                                         | 0.87 (0.12 – 6.19)                     |                                                       |
|            |           | GSE42568                   | RFS | -                                                      | -                                       | -                                      | <b>0.02 (52 / 104)</b><br>0.41 (0.19 – 0.89)<br>Bad   |
|            |           |                            | OS  | -                                                      | -                                       | -                                      | <b>0.0016 (52 / 104)</b><br>0.22 (0.08 – 0.62)<br>Bad |
|            |           |                            | PPS | -                                                      | -                                       | -                                      | 0.28 (8 / 17)                                         |
|            | RNA-seq   | GSE96058                   | OS  | <b>0.016 (156 / 313)</b><br>0.36 (0.15 – 0.86)<br>Good | 0.088 (429 / 854)<br>0.44 (0.17 – 1.16) | 0.68 (724 / 1448)<br>0.92 (0.6 – 1.39) | 0.8 (170 / 340)<br>0.91 (0.41 – 1.98)                 |
| cBioPortal | Gene Chip | METABRIC                   | RFS | 0.381 (258 / 543)                                      | 0.283 (91 / 191)                        | <b>0.0325 (495/1025)</b><br>Bad        | 0.965 (107 / 221)                                     |
|            |           |                            | OS  | 0.458 (259 / 543)                                      | 0.625 (91 / 191)                        | 0.325 (495 / 1025)                     | 0.933 (107 / 221)                                     |
|            | RNA-seq   | TCGA<br>PanCancer<br>Atlas | OS  | <b>0.0295 (537 / 1077)</b><br>Bad                      | Any: 6                                  | -                                      | -                                                     |
|            |           |                            | PFS | 0.279 (536 / 1077)                                     | Any: NA (NA / 6)                        | -                                      | -                                                     |

|  |  |  |      |                    |                  |   |   |
|--|--|--|------|--------------------|------------------|---|---|
|  |  |  | DSFS | 0.345 (533 / 1077) | Any: NA (NA / 6) | - | - |
|  |  |  | DFS  | 0.891 (454 / 1077) | Any: NA (NA / 6) | - | - |

**Table S7.** Prognosis associated with high *SETD7* in BC considering stage. Significant values are highlighted in bold (Log rank test p-val  $\leq 0.05$ ) and strong tendencies (Log rank test p-val  $\leq 0.1$ ) are shown in italic. DFS – Disease Free Survival; DSFS – Disease-specific Free Survival; NA – Not Available, because the number of samples were too low for each subgroup; OS – Overall Survival; PFS – Progression Free Survival; RFS – Recurrence/Relapse Free Survival.

| Online tool | Type of data | Dataset  | Survival | Stage 0<br>p-value<br>(nSETD7 DE / nTotal samples) | Stage I<br>p-value<br>(nSETD7 DE / nTotal samples) | Stage II<br>p-value<br>(nSETD7 DE / nTotal samples) | Stage III<br>p-value<br>(nSETD7 DE / nTotal samples) | Stage IV<br>p-value<br>(nSETD7 DE / nTotal samples) |
|-------------|--------------|----------|----------|----------------------------------------------------|----------------------------------------------------|-----------------------------------------------------|------------------------------------------------------|-----------------------------------------------------|
| HPA         | RNA-seq      | TCGA     | OS       | -                                                  | <i>0.095 (180 / 180)</i><br><i>Bad</i>             | <b>0.00027 (609 / 609)</b><br><b>Bad</b>            | 0.84 (243 / 243)                                     | 0.90 (20 / 20)                                      |
| cBioPortal  | Gene chip    | METABRIC | OS       | NA (NA / 24)                                       | 0.634 (237 / 630)                                  | 0.668 (400 / 979)                                   | <i>0.0957 (57 / 144)</i><br><i>Good</i>              | NA (NA / 11)                                        |

|               |         |                            |      |              |                   |                                         |                  |                 |
|---------------|---------|----------------------------|------|--------------|-------------------|-----------------------------------------|------------------|-----------------|
|               |         |                            | RFS  | NA (NA / 24) | 0.249 (236 / 630) | <b>0.0396 (400 / 979)</b><br><b>Bad</b> | 0.217 (57 / 144) | NA (NA / 11)    |
|               | RNA-seq | TCGA<br>PanCancer<br>Atlas | OS   | -            | 0.332 (138 / 277) | <b>0.0283 (313 / 628)</b><br><b>Bad</b> | 0.520 (69 / 137) | 0.633 (19 / 39) |
|               |         |                            | DFS  | -            | 0.567 (123 / 277) | <b>0.0569 (312 / 628)</b><br><b>Bad</b> | 0.624 (57 / 137) | 0.241 (9 / 39)  |
|               |         |                            | PFS  | -            | 0.612 (137 / 277) | 0.120 (313 / 628)                       | 0.991 (69 / 137) | 0.728 (19 / 39) |
|               |         |                            | DSFS | -            | 0.877 (137 / 277) | 0.325 (270 / 628)                       | 0.685 (67 / 137) | 0.879 (19 / 39) |
| KM<br>plotter | Protein | Tang_2018                  | OS   | -            | NA (6 / 6)        | <b>0.036 (46 / 46)</b><br><b>Bad</b>    | NA (13 / 13)     | -               |

**Table S8.** Prognosis associated with high *SETD7* in BC considering grade. Significant values are highlighted in bold (Log rank test p-val  $\leq 0.05$ ) and strong tendencies (Log rank test p-val  $\leq 0.1$ ) are shown in italic. **CI** – Confidence Interval, DMFS – Distant Metastasis Free Survival; **HR** – Hazard Ratio, NA – Not Available, either because the number of samples were too low for each subgroup or simply because KM plotter didn't perform the analysis; OS – Overall Survival; PPS – Palliative Performance Score; RFS – Recurrence/Relapse Free Survival.

| Online Tool | Type of data | Datasets                                 | Survival | Grade I<br>p-value (nSETD7 DE /<br>nTotal samples)<br><i>HR (CI) / prognosis</i> | Grade II<br>p-value (nSETD7 DE /<br>nTotal samples)<br><i>HR (CI) / prognosis</i> | Grade III<br>p-value (nSETD7 DE /<br>nTotal samples)<br><i>HR (CI) / prognosis</i> |
|-------------|--------------|------------------------------------------|----------|----------------------------------------------------------------------------------|-----------------------------------------------------------------------------------|------------------------------------------------------------------------------------|
| KM plotter  | Gene chip    | All studies<br>reporting<br>Grade status | RFS      | <b>0.03 (56 / 113)</b><br><b>0 (0 – Inf) Good</b>                                | 0.8 (121 / 243)<br><i>1.09 (0.56 – 2.14)</i>                                      | 0.74 (242 / 481)<br><i>0.93 (0.62 – 1.41)</i>                                      |
|             |              |                                          | DMFS     | NA (NA / 44)<br>-                                                                | 0.5 (46 / 91)<br><i>1.54 (0.43 – 5.44)</i>                                        | 0.093 (116 / 234)<br><i>1.98 (0.88 – 4.44)</i>                                     |
|             |              |                                          | OS       | 0.48 (12 / 26)<br><i>2.35 (0.2 – 27.18)</i>                                      | 0.82 (32 / 64)<br><i>0.82 (0.14 – 4.9)</i>                                        | <i>0.061 (102 / 204)</i><br><i>0.52 (0.26 – 1.04) Good</i>                         |
|             |              |                                          | PPS      | 0.69 (4 / 6)<br><i>1.62 (0.14 – 18.31)</i>                                       | 0.69 (6 / 13)<br><i>0.62 (0.05 – 7)</i>                                           | <b>0.0022 (36 / 72)</b><br><b>0.24 (0.09 – 0.64) Good</b>                          |
|             |              | GSE16391                                 | RFS      | NA (NA / 2)                                                                      | 0.14 (16 / 30)                                                                    | NA (NA / 16)                                                                       |

|  |  |           |            |                                     |                                       |                                                      |
|--|--|-----------|------------|-------------------------------------|---------------------------------------|------------------------------------------------------|
|  |  |           |            | -                                   | -                                     | -                                                    |
|  |  | GSE16446  | RFS / DMFS | NA (NA / 2)<br>-                    | NA (NA / 19)<br>-                     | <b>0.013 (40 / 81)</b><br><b>173e7 (0 - Inf) Bad</b> |
|  |  |           | OS         | NA (NA / 2)<br>-                    | NA (NA / 19)<br>-                     | 0.13 (40 / 81)<br>139e7 (0 – Inf)                    |
|  |  | GSEE17907 | RFS / DMFS | -                                   | NA (NA / 8)<br>-                      | 0.49 (14 / 29)<br>-                                  |
|  |  | GSE19615  | RFS / DMFS | NA (NA / 23)<br>-                   | 0.06 (14 / 28)<br>195e7 (0 – Inf) Bad | 0.63 (32 / 64)<br>1.54 (0.26 – 9.22)                 |
|  |  |           | RFS        | NA (NA / 13)<br>-                   | NA (NA / 5)<br>-                      | 0.37 (36 / 70)<br>1.55 (0.59 – 4.11)                 |
|  |  |           | OS         | NA (NA / 13)<br>-                   | NA (NA / 5)<br>-                      | 0.63 (36 / 70)<br>1.34 (0.41 – 4.4)                  |
|  |  |           | PPS        | NA (NA / 3)<br>-                    | NA (NA / 2)<br>-                      | 0.21 (18 / 37)<br>0.4 (0.09 – 1.75)                  |
|  |  | GSE21653  | RFS        | 0.082 (22 / 43)<br>0 (0 – Inf) Good | 0.79 (38 / 77)<br>1.16 (0.39 – 3.47)  | 0.92 (54 / 107)<br>0.95 (0.4 – 2.3)                  |



|  |         |           |      |                                                        |                                                        |                                                                   |
|--|---------|-----------|------|--------------------------------------------------------|--------------------------------------------------------|-------------------------------------------------------------------|
|  |         | GSE42568  | RFS  | NA (NA/ 11)<br>-                                       | 0.79 (20 / 40)<br><a href="#">0.83 (0.2 – 3.36)</a>    | 0.2 (26 / 53)<br><a href="#">0.51 (0.17 – 1.47)</a>               |
|  |         |           | OS   | NA (NA/ 11)<br>-                                       | 0.57 (20 / 40)<br><a href="#">0.6 (0.1 – 3.6)</a>      | <b>0.02 (26 / 53)</b><br><a href="#">0.22 (0.06 – 0.89) Good</a>  |
|  |         |           | PPS  | NA (NA / 3)<br>-                                       | NA (NA / 8)<br>-                                       | <b>0.04 (12 / 22)</b><br><a href="#">0.19 (0.03 – 1.09) Good</a>  |
|  |         | GSE61304  | RFS  | NA (NA / 5)<br>-                                       | NA (NA / 16)<br>-                                      | <b>0.042 (18 / 37)</b><br><a href="#">0.09 (0.01 – 0.74) Good</a> |
|  |         |           | DMFS | NA (NA / 5)<br>-                                       | NA (NA / 16)<br>-                                      | 0.14 (19 / 36)<br>0.23 (0.03 – 1.94)                              |
|  |         | GSE9195   | RFS  | NA (NA / 14)<br>-                                      | NA (NA / 20)<br>-                                      | 0.84 (12 / 24)<br><a href="#">0.82 (0.11 – 5.83)</a>              |
|  |         |           | DMFS | NA (NA / 14)<br>-                                      | NA (NA / 20)<br>-                                      | 0.6 (12 / 24)<br><a href="#">1.88 (0.17 – 20.82)</a>              |
|  | RNA-seq | GSE96058  | OS   | 0.35 (224 / 449)<br><a href="#">0.52 (0.13 – 2.08)</a> | 0.18 (698 / 1394)<br><a href="#">0.7 (0.41 – 1.18)</a> | 0.9 (536 / 1074)<br><a href="#">0.97 (0.65 – 1.46)</a>            |
|  | Protein | Tang_2018 | OS   | NA (8 / 8)<br>-                                        | NA (19 / 19)<br>-                                      | <b>0.016 (28 / 28)</b><br><a href="#">3.39 (1.14 – 10.14) Bad</a> |

|            |           |          |     |                  |                   |                    |
|------------|-----------|----------|-----|------------------|-------------------|--------------------|
| cBioPortal | Gene chip | METABRIC | OS  | 0.516 (83 / 214) | 0.745 (370 / 976) | 0.421 (463 / 1198) |
|            |           |          | RFS | 0.863 (83 / 214) | 0.186 (370 / 976) | 0.309 (462 / 1198) |

**Table S9.** Prognosis associated with high *SETD7* in BC considering lymph node status. Significant values are highlighted in bold (Log rank test p-val  $\leq 0.05$ ) and strong tendencies (Log rank test p-val  $\leq 0.1$ ) are shown in italic. **CI – Confidence Interval**, DFS – Disease Free Survival; DFSF – Disease-specific Free Survival; **HR – Hazard Ratio**, NA – Not Available, either because the number of samples were too low for each subgroup or because the analysis wasn’t processed by KM plotter; OS – Overall Survival; PFS – Progression Free Survival; RFS – Recurrence/Relapse Free Survival.

| Online Tool | Type of data | Dataset | Survival | Lymph node status                                                              |                                                                                |
|-------------|--------------|---------|----------|--------------------------------------------------------------------------------|--------------------------------------------------------------------------------|
|             |              |         |          | Positive<br>p-value (nSETD7 DE / nTotal samples)<br><b>HR (CI) / Prognosis</b> | Negative<br>p-value (nSETD7 DE / nTotal samples)<br><b>HR (CI) / Prognosis</b> |

|               |                                 |                                               |            |                                                                               |                                                        |
|---------------|---------------------------------|-----------------------------------------------|------------|-------------------------------------------------------------------------------|--------------------------------------------------------|
| KM<br>plotter | Gene chip data<br>(EGA and GEO) | All studies<br>reporting lymph<br>node status | RFS        | 0.11 (408 / 814)<br><a href="#">0.76 (0.54 – 1.07)</a>                        | 0.74 (288 / 574)<br><a href="#">0.91 (0.52 – 1.58)</a> |
|               |                                 |                                               | DMFS       | 0.19 (130 / 261)<br>1.58 (0.79 – 3.18)                                        | 0.39 (120 / 240)<br><a href="#">0.62 (0.2 – 1.89)</a>  |
|               |                                 |                                               | OS         | 0.059 (116 / 230)<br><a href="#">0,53 (0.28 – 1.03)</a> <i>Good</i>           | 0.91 (90 / 180)<br><a href="#">0.93 (0.28 – 3.06)</a>  |
|               |                                 |                                               | PPS        | <b>0.00013 (38 / 76)</b><br><a href="#">0.15 (0.05 – 0.45)</a><br><b>Good</b> | 0.45 (12 / 23)<br><a href="#">0.5 (0.08 – 3.05)</a>    |
|               |                                 | E-MTAB-365                                    | RFS        | 0.96 (142 / 285)<br>1.02 (0.54 – 1.9)                                         | 0.43 (68 / 134)<br>0.71 (0.31 – 1.65)                  |
|               |                                 | GSE16391                                      | RFS        | 0.14 (16 / 30)<br><a href="#">4.53 (0.5 – 40.94)</a>                          | NA (NA / 18)<br>-                                      |
|               |                                 | GSE16446                                      | RFS / DMFS | 0.053 (30 / 59)<br><a href="#">6.39 (0.74 – 54.99)</a> <i>Bad</i>             | 0.5 (24 / 48)<br><a href="#">2.18 (0.21 – 22.2)</a>    |
|               |                                 |                                               | OS         | 0.48 (30 / 59)<br><a href="#">2.32 (0.21 – 25.8)</a>                          | 0.31 (24 / 48)<br><a href="#">114e7 (0 – Inf)</a>      |
|               |                                 | GSEE17907                                     | RFS / DMFS | 0.51 (12 / 24)                                                                | NA (NA / 11)                                           |

|  |  |          |            |                                                      |                                                   |
|--|--|----------|------------|------------------------------------------------------|---------------------------------------------------|
|  |  |          |            | 0.55 (0.09 – 3.33)                                   | -                                                 |
|  |  | GSE19615 | RFS / DMFS | 0.37 (26 / 53)<br>2.15 (0.39 – 11.74)                | 0.31 (32 / 62)<br>0.33 (0.03 – 3.15)              |
|  |  | GSE20711 | RFS        | 0.99 (30 / 59)<br>1 (0.36 – 2.75)                    | 0.11 (14 / 29)<br>4.99 (0.56 – 44.83)             |
|  |  |          | OS         | 0.45 (30 / 59)<br>0.61 (0.17 – 2.18)                 | 0.14 (14 / 29)<br>175e7 (0 – Inf)                 |
|  |  |          | PPS        | 0.055 (18 / 35)<br>0.26 (0.06 – 1.12) <i>Good</i>    | NA (NA / 7)<br>-                                  |
|  |  | GSE21653 | RFS        | 0.77 (60 / 119)<br>0.88 (0.39 – 2.01)                | 0.71 (54 / 108)<br>0.79 (0.23 – 2.74)             |
|  |  | GSE42568 | RFS        | 0.4 (30 / 59)<br>0.69 (0.29 – 1.64)                  | 0.042 (22 / 45)<br>0.14 (0.01 – 1.26) <b>Good</b> |
|  |  |          | OS         | 0.04 (30 / 59)<br>0.33 (0.11 – 1) <b>Good</b>        | 0.026 (22 / 45)<br>0 (0 – Inf) <b>Good</b>        |
|  |  |          | PPS        | 0.029 (14 / 28)<br>0.18 (0.03 – 0.98)<br><b>Good</b> | NA (NA / 5)<br>-                                  |

|  |         |           |      |                                                   |                                                     |
|--|---------|-----------|------|---------------------------------------------------|-----------------------------------------------------|
|  |         | GSE61304  | RFS  | 0.096 (18 / 37)<br>0.28 (0.06 – 1.39) <i>Good</i> | 0.19 (11 / 20)<br>0 (0 – Inf)                       |
|  |         |           | DMFS | 0.3 (18 / 37)<br>0.42 (0.08 – 2.27)               | 0.19 (11 / 20)<br>0 (0 – Inf)                       |
|  |         | GSE65194  | RFS  | NA (NA / 53)                                      | NA (NA / 58)                                        |
|  |         |           | OS   | 0.31 (26 / 53)<br>3.08 (0.32 – 29.71)             | NA (NA / 58)<br>-                                   |
|  |         |           | DMFS | 0.51 (26 / 53)<br>1.65 (0.37 – 7.42)              | 0.16 (28 / 58)<br>0 (0 – Inf)                       |
|  |         | GSE9195   | RFS  | 0.28 (18 / 36)<br>0.41 (0.07 – 2.23)              | NA (NA / 41)<br>-                                   |
|  |         |           | DMFS | 0.81 (18 / 36)<br>0.79 (0.11 – 5.67)              | NA (NA / 41)<br>-                                   |
|  | RNA-seq | GSE96058  | OS   | 0.47 (911 / 1067)<br>0.85 (0.55 – 1.32)           | 0.055 (534 / 1820)<br>0.63 (0.39 – 1.01)            |
|  | Protein | Tang_2018 | OS   | 0.8 (27 / 27)<br>0.85 (0.24 – 3.01)               | 0.00019 (37 / 37)<br>7.28 (2.17 – 24.47) <b>Bad</b> |

|            |           |                         |      |                                         |                    |
|------------|-----------|-------------------------|------|-----------------------------------------|--------------------|
| cBioPortal | Gene Chip | METABRIC                | RFS  | <b>0.038 (455 / 1047)</b><br><b>Bad</b> | 0.680 (496 / 1196) |
|            |           |                         | OS   | 0.423 (455 / 1047)                      | 0.766 (497 / 1196) |
|            | RNA-seq   | TCGA PanCancer<br>Atlas | OS   | 0.116 (343 / 687)                       | 0.806 (17 / 33)    |
|            |           |                         | DFS  | 0.337 (299 / 687)                       | 0.407 (11 / 33)    |
|            |           |                         | DSFS | 0.447 (340 / 687)                       | 0.806 (17 / 33)    |
|            |           |                         | PFS  | 0.772 (342 / 687)                       | 0.468 (17 / 33)    |

## References

1. Dhayalan, A.; Kudithipudi, S.; Rathert, P.; Jeltsch, A. Specificity Analysis-Based Identification of New Methylation Targets of the SET7/9 Protein Lysine Methyltransferase. *Chem. Biol.* **2011**, *18* (1), 111–120.
2. Ko, S.; Ahn, J.; Song, C. S.; Kim, S.; Knapczyk-Stwora, K.; Chatterjee, B. Lysine Methylation and Functional Modulation of Androgen Receptor by Set9 Methyltransferase. *Mol. Endocrinol.* **2011**, *25* (3), 433–444.
3. Gaughan, L.; Stockley, J.; Wang, N.; McCracken, S. R. C.; Treumann, A.; Armstrong, K.; Shaheen, F.; Watt, K.; McEwan, I. J.; Wang, C.; et al. Regulation of the Androgen Receptor by SET9-Mediated Methylation. *Nucleic Acids Res.* **2011**, *39* (4), 1266–1279.
4. Shen, C.; Wang, D.; Liu, X.; Gu, B.; Du, Y.; Wei, F. Z.; Cao, L. L.; Song, B.; Lu, X.; Yang, Q.; et al. SET7/9 Regulates Cancer Cell Proliferation by Influencing  $\beta$ -Catenin Stability. *FASEB J.* **2015**, *29* (10), 4313–4323.
5. Estève, P. O.; Chin, H. G.; Benner, J.; Feehery, G. R.; Samaranayake, M.; Horwitz, G. A.; Jacobsen, S. E.; Pradhan, S.

Regulation of DNMT1 Stability through SET7-Mediated Lysine Methylation in Mammalian Cells. *Proc. Natl. Acad. Sci. U. S. A.* **2009**, *106* (13), 5076–5081.

6. Subramanian, K.; Jia, D.; Kapoor-Vazirani, P.; Powell, D. R.; Collins, R. E.; Sharma, D.; Peng, J.; Cheng, X.; Vertino, P. M. Regulation of Estrogen Receptor Alpha by the SET7 Lysine Methyltransferase. *Mol. Cell* **2008**, *30* (3), 336–347.
7. Xie, Q.; Bai, Y.; Wu, J.; Sun, Y.; Wang, Y.; Zhang, Y.; Mei, P.; Yuan, Z. Methylation-Mediated Regulation of E2F1 in DNA Damage-Induced Cell Death. *J. Recept. Signal Transduct.* **2011**, *31* (2), 139–146.
8. Kontaki, H.; Talianidis, I. Lysine Methylation Regulates E2F1-Induced Cell Death. *Mol. Cell* **2010**, *39* (1), 152–160.
9. Calnan, D. R.; Webb, A. E.; White, J. L.; Stowe, T. R.; Goswami, T.; Shi, X.; Espejo, A.; Bedford, M. T.; Gozani, O.; Gygi, S. P.; et al. Methylation by Set9 Modulates FoxO3 Stability and Transcriptional Activity. *Aging (Albany, NY)*. **2012**, *4* (7), 462–479.
10. Xie, Q.; Hao, Y.; Tao, L.; Peng, S.; Rao, C.; Chen, H.; You, H.; Dong, M. Q.; Yuan, Z. Lysine Methylation of FOXO3 Regulates Oxidative Stress-Induced Neuronal Cell Death. *EMBO Rep.* **2012**, *13* (4), 371.
11. Fu, L.; Wu, H.; Cheng, S. Y.; Gao, D.; Zhang, L.; Zhao, Y. Set7 Mediated Gli3 Methylation Plays a Positive Role in the Activation of Sonic Hedgehog Pathway in Mammals. *Elife* **2016**, *5* (MAY2016), e15690.
12. Kim, Y.; Nam, H. J.; Lee, J.; Park, D. Y.; Kim, C.; Yu, Y. S.; Kim, D.; Park, S. W.; Bhin, J.; Hwang, D.; et al. Methylation-Dependent Regulation of HIF-1 $\alpha$  Stability Restricts Retinal and Tumour Angiogenesis. *Nat. Commun.* **2016**, *7*, 10347.
13. Pagans, S.; Kauder, S. E.; Kaehlcke, K.; Sakane, N.; Schroeder, S.; Dormeyer, W.; Trievel, R. C.; Verdin, E.; Schnolzer, M.; Ott, M. Set7/9 (KMT7) Binds HIV-1 TAR RNA, Monomethylates Tat and Enhances Tat-Dependent HIV Transcription. *Cell Host Microbe* **2010**, *7* (3), 234.

14. Ali, I.; Ramage, H.; Boehm, D.; Dirk, L. M. A.; Sakane, N.; Hanada, K.; Pagans, S.; Kaehlcke, K.; Aull, K.; Weinberger, L.; et al. The HIV-1 Tat Protein Is Monomethylated at Lysine 71 by the Lysine Methyltransferase KMT7. *J. Biol. Chem.* **2016**, 291 (31), 16240.
15. Masatsugu, T.; Yamamoto, K. Multiple Lysine Methylation of PCAF by Set9 Methyltransferase. *Biochem. Biophys. Res. Commun.* **2009**, 381 (1), 22–26.
16. Vasileva, E.; Shuvalov, O.; Petukhov, A.; Fedorova, O.; Daks, A.; Nader, R.; Barlev, N. KMT Set7/9 Is a New Regulator of Sam68 STAR-Protein. *Biochem. Biophys. Res. Commun.* **2020**, 525 (4), 1018–1024.
17. Kim, S. K.; Lee, H.; Han, K.; Kim, S. C.; Choi, Y.; Park, S. W.; Bak, G.; Lee, Y.; Choi, J. K.; Kim, T. K.; et al. SET7/9 Methylation of the Pluripotency Factor LIN28A Is a Nucleolar Localization Mechanism That Blocks Let-7 Biogenesis in Human ESCs. *Cell Stem Cell* **2014**, 15 (6), 735.
18. Balasubramanian, N.; Ananthanarayanan, M.; Suchy, F. J. Direct Methylation of FXR by Set7/9, a Lysine Methyltransferase, Regulates the Expression of FXR Target Genes. *Am. J. Physiol. - Gastrointest. Liver Physiol.* **2012**, 302 (9), G937.
19. Kassner, I.; Andersson, A.; Fey, M.; Tomas, M.; Ferrando-May, E.; Hottiger, M. O. SET7/9-Dependent Methylation of ARTD1 at K508 Stimulates Poly-ADP-Ribose Formation after Oxidative Stress. *Open Biol.* **2013**, 3 (10), 120173.
20. Maganti, A. V.; Maier, B.; Tersey, S. A.; Sampley, M. L.; Mosley, A. L.; Özcan, S.; Pachaiyappan, B.; Woster, P. M.; Hunter, C. S.; Stein, R.; et al. Transcriptional Activity of the Islet  $\beta$  Cell Factor Pdx1 Is Augmented by Lysine Methylation Catalyzed by the Methyltransferase Set7/9. *J. Biol. Chem.* **2015**, 290 (15), 9812.
21. Aguilo, F.; Li, S. De; Balasubramanian, N.; Sancho, A.; Benko, S.; Zhang, F.; Vashisht, A.; Rengasamy, M.; Andino, B.; Chen, C. hung; et al. Deposition of 5-Methylcytosine on Enhancer RNAs Enables the Coactivator Function of PGC-1 $\alpha$ . *Cell Rep.*



**2016**, 14 (3), 479–492.

22. Cho, H. S.; Suzuki, T.; Dohmae, N.; Hayami, S.; Unoki, M.; Yoshimatsu, M.; Toyokawa, G.; Takawa, M.; Chen, T.; Kurash, J. K.; et al. Demethylation of RB Regulator MYPT1 by Histone Demethylase LSD1 Promotes Cell Cycle Progression in Cancer Cells. *Cancer Res.* **2011**, 71 (3), 655–660.
23. Carr, S. M.; Munro, S.; Kessler, B.; Oppermann, U.; La Thangue, N. B. Interplay between Lysine Methylation and Cdk Phosphorylation in Growth Control by the Retinoblastoma Protein. *EMBO J.* **2011**, 30 (2), 317–327.
24. Munro, S.; Khaire, N.; Inche, A.; Carr, S.; La Thangue, N. B. Lysine Methylation Regulates the PRb Tumour Suppressor Protein. *Oncogene* **2010**, 29 (16), 2357–2367.
25. Ea, C. K.; Baltimore, D. Regulation of NF-KB Activity through Lysine Monomethylation of P65. *Proc. Natl. Acad. Sci. U. S. A.* **2009**, 106 (45).
26. Yang, X. D.; Huang, B.; Li, M.; Lamb, A.; Kelleher, N. L.; Chen, L. F. Negative Regulation of NF-KappaB Action by Set9-Mediated Lysine Methylation of the RelA Subunit. *EMBO J.* **2009**, 28 (8), 1055–1066.
27. Hong, X.; Huang, H.; Qiu, X.; Ding, Z.; Feng, X.; Zhu, Y.; Zhuo, H.; Hou, J.; Zhao, J.; Cai, W.; et al. Targeting Posttranslational Modifications of RIOK1 Inhibits the Progression of Colorectal and Gastric Cancers. *Elife* **2018**, 7, e29511.
28. Song, H.; Chu, J. W.; Park, S. C.; Im, H.; Park, I. G.; Kim, H.; Lee, J. M. Isoform-specific Lysine Methylation of ROR $\alpha$ 2 by SETD7 Is Required for Association of the TIP60 Coactivator Complex in Prostate Cancer Progression. *Int. J. Mol. Sci.* **2020**, 21 (5), 1622.
29. Hamidi, T.; Singh, A. K.; Veland, N.; Vemulapalli, V.; Chen, J.; Hardikar, S.; Bao, J.; Fry, C. J.; Yang, V.; Lee, K. A.; et al. Identification of Rpl29 as a Major Substrate of the Lysine Methyltransferase Set7/9. *J. Biol. Chem.* **2018**, 293 (33), 12770–12780.

30. Liu, X.; Wang, D.; Zhao, Y.; Tu, B.; Zheng, Z.; Wang, L.; Wang, H.; Gu, W.; Roeder, R. G.; Zhu, W. G. Methyltransferase Set7/9 Regulates P53 Activity by Interacting with Sirtuin 1 (SIRT1). *Proc. Natl. Acad. Sci. U. S. A.* **2011**, *108* (5), 1925–1930.
31. Elkouris, M.; Kontaki, H.; Stavropoulos, A.; Antonoglou, A.; Nikolaou, K. C.; Samiotaki, M.; Szantai, E.; Saviolaki, D.; Brown, P. J.; Sideras, P.; et al. SET9-Mediated Regulation of TGF- $\beta$  Signaling Links Protein Methylation to Pulmonary Fibrosis. *Cell Rep.* **2016**, *15* (12), 2733–2744.
32. Fang, L.; Zhang, L.; Wei, W.; Jin, X.; Wang, P.; Tong, Y.; Li, J.; Du, J. X.; Wong, J. A Methylation-Phosphorylation Switch Determines Sox2 Stability and Function in ESC Maintenance or Differentiation. *Mol. Cell* **2014**, *55* (4), 537–551.
33. Stark, G. R.; Wang, Y.; Lu, T. Lysine Methylation of Promoter-Bound Transcription Factors and Relevance to Cancer. *Cell Res.* **2011**, *21* (3), 375.
34. Wang, D.; Zhou, J.; Liu, X.; Lu, D.; Shen, C.; Du, Y.; Wei, F. Z.; Song, B.; Lu, X.; Yu, Y.; et al. Methylation of SUV39H1 by SET7/9 Results in Heterochromatin Relaxation and Genome Instability. *Proc. Natl. Acad. Sci. U. S. A.* **2013**, *110* (14), 5516–5521.
35. Couture, J. F.; Collazo, E.; Hauk, G.; Trievel, R. C. Structural Basis for the Methylation Site Specificity of SET7/9. *Nat. Struct. Mol. Biol.* **2006**, *13* (2), 140–146.
36. Kouskouti, A.; Scheer, E.; Staub, A.; Tora, L.; Talianidis, I. Gene-Specific Modulation of TAF10 Function by SET9-Mediated Methylation. *Mol. Cell* **2004**, *14* (2), 175–182.
37. Ivanov, G. S.; Ivanova, T.; Kurash, J.; Ivanov, A.; Chuikov, S.; Gizatullin, F.; Herrera-Medina, E. M.; Rauscher, F.; Reinberg, D.; Barlev, N. A. Methylation-Acetylation Interplay Activates P53 in Response to DNA Damage. *Mol. Cell. Biol.* **2007**, *27* (19), 6756–6769.

38. Oudhoff, M. J.; Freeman, S. A.; Couzens, A. L.; Antignano, F.; Kuznetsova, E.; Min, P. H.; Northrop, J. P.; Lehnertz, B.; Barsyte-Lovejoy, D.; Vedadi, M.; et al. Control of the Hippo Pathway by Set7-Dependent Methylation of Yap. *Dev. Cell* **2013**, 26 (2), 188–194.
39. Zhang, W. J.; Wu, X. N.; Shi, T. T.; Xu, H. T.; Yi, J.; Shen, H. F.; Huang, M. F.; Shu, X. Y.; Wang, F. F.; Peng, B. L.; et al. Regulation of Transcription Factor Yin Yang 1 by SET7/9-Mediated Lysine Methylation. *Sci. Rep.* **2016**, 6.
40. Wu, X. N.; Shi, T. T.; He, Y. H.; Wang, F. F.; Sang, R.; Ding, J. C.; Zhang, W. J.; Shu, X. Y.; Shen, H. F.; Yi, J.; et al. Methylation of Transcription Factor YY2 Regulates Its Transcriptional Activity and Cell Proliferation. *Cell Discov.* **2017**, 3, 17035.
